# Supplementary material
Source: publisher figshare collection journal article supplement (https://tandf.figshare.com/ndownloader/files/39643987)
Supplement: Supplementary file [file 39643987]

## Supporting Information

### Overcoming the imatinib-resistant BCR-ABL mutants with new ureidobenzothiazole chemotypes endowed with potent and broad-spectrum anticancer activity

Ashraf K. El-Damasy<sup>a,b,1\*</sup>, Heewon Jin<sup>a,1</sup>, Jung Woo Park<sup>c</sup>, Hyun Ji Kim<sup>a</sup>, Hanan Khojah<sup>d</sup>, Seon Hee Seo<sup>e</sup>, Ju-Hyeon Lee<sup>a</sup>, Eun-Kyoung Bang<sup>a</sup>, Gyochang Keum<sup>a,f\*</sup>

<sup>a</sup> Center for Brain Technology, Brain Science Institute, Korea Institute of Science and Technology (KIST), Seoul 02792, Republic of Korea

<sup>b</sup> Department of Medicinal Chemistry, Faculty of Pharmacy, Mansoura University, Mansoura 35516, Egypt

<sup>c</sup> Center for Supercomputing Applications, Div. of National Supercomputing R&D, Korea Institute of Science and Technology Information, 245, Daehak-ro, Yuseong-gu, Daejeon, 34141, Republic of Korea

<sup>d</sup> Department of Pharmacognosy, College of Pharmacy, Jouf University, P.O. Box 2014, Sakaka, Al-Jouf, Saudi Arabia

<sup>e</sup> Center for Brain Disorders, Brain Science Institute, Korea Institute of Science and Technology (KIST), Seoul 02792, Republic of Korea

<sup>f</sup> Division of Bio-Medical Science & Technology, KIST School, Korea University of Science and Technology (UST), Seoul 02792, Republic of Korea

<sup>1</sup> These authors contributed equally to this work.

#### Corresponding author:

Ashraf K. El-Damasy, E-mail: [ph\\_karem2000@mans.edu.eg](mailto:ph_karem2000@mans.edu.eg), [phkarem2006@gmail.com](mailto:phkarem2006@gmail.com)

Gyochang Keum, E-mail: [gkeum@kist.re.kr](mailto:gkeum@kist.re.kr)

#### Contents

| Contents                                                | Pages |
|---------------------------------------------------------|-------|
| 1) Experimental section                                 | 2–3   |
| 2) <sup>1</sup> H NMR and <sup>13</sup> C NMR spectra   | 4–10  |
| 3) HRMS charts                                          | 11–13 |
| 4) 2D binding mode & bioavailability radar of <b>2b</b> | 14    |
| 5) NCI data                                             | 15–19 |
| 6) References                                           | 20    |

## 1. Experimental section

### 1.1. General

All reactions and manipulations were conducted utilizing standard Schlenk techniques. All solvents and reagents were obtained from commercial suppliers and were used without further purification. The reaction progress was monitored on TLC plate (Merck, silica gel 60 F<sub>254</sub>). Flash column chromatography was carried out using silica gel (Merck, 230–400 mesh) and the eluent solvents are indicated as a mixed solvent with either given percentage or volume-to-volume ratios. <sup>1</sup>H and <sup>13</sup>C NMR spectra were recorded on a Bruker Avance 400 MHz spectrometer, using the proper deuterated solvents, as noted. Chemical shifts (δ) are given in parts per million (ppm) upfield from tetramethylsilane (TMS) as internal standard. s, d, t, and m refer to singlet, doublet, triplet and multiplet, respectively, and coupling constants (*J*) are reported in hertz (Hz). High resolution mass spectra (HRMS) were recorded on JMS 700 (Jeol, Japan) mass spectrometer, with magnetic sector-electric sector double focusing mass analyzer, and FAB+ ion mode. The purity of all final compounds was found to be > 95%, as determined by <sup>1</sup>H NMR. 3-(Trifluoromethyl)aniline and 3,5-bis(trifluoromethyl)aniline were commercially available, while the cyclic amine bearing anilines were synthesized adopting the reported procedure \.

#### 1.2. 6-(2-Methoxyphenyl)benzo[d]thiazol-2-amine (**1**)

A solution of 2-methoxyphenyl boronic acid (199 mg, 1.31 mmol) in dimethoxyethane:H<sub>2</sub>O (3:1, v/v, 3 mL) was added to a stirred solution of 6-bromo-2-aminothiazol (200 mg, 0.873 mmol), NaHCO<sub>3</sub> (220 mg, 2.619 mmol), and Pd(dppf)Cl<sub>2</sub>·CH<sub>2</sub>Cl<sub>2</sub> (143 mg, 0.20 mmol) in dimethoxyethane:H<sub>2</sub>O (3:1, v/v, 1 mL). The reaction mixture was stirred at room temperature for 85 min at 80–85 °C. After the reaction completion, the solvent was evaporated under vacuum, and the residue was filtered by celite pad. The filtrate was evaporated and the resulting residue was purified by column chromatography using (33–50% ethyl acetate in hexane) to afford the title compound as a brown solid; 194 mg (86.6%); <sup>1</sup>H NMR (400 MHz, CDCl<sub>3</sub>) δ 7.77 (d, *J* = 1.4 Hz, 1H), 7.58 (d, *J* = 8.3 Hz, 1H), 7.48 (dd, *J* = 8.3, 1.6 Hz, 1H), 7.35–7.30 (m, 2H), 7.04 (td, *J* = 7.5, 0.84 Hz, 1H), 7.00 (d, *J* = 8.2 Hz, 1H), 5.42 (br. s, 1H), 3.83 (s, 3H); <sup>13</sup>C NMR (100 MHz, CDCl<sub>3</sub>) δ 167.0, 156.4, 146.7, 133.8, 130.9, 129.9, 129.2, 128.8, 128.3, 122.2, 120.9, 117.4, 111.3, 55.6.

#### 1.3. General procedure for synthesis of compounds **2a–f**

A solution of compound **1** (200 mg, 0.78 mmol) and 1,1'-carbonyldiimidazole (253 mg, 1.56 mmol) in anhydrous dimethylformamide (2 mL) was stirred at room temperature for 15 h. Then, the appropriate aniline (1.56 mmol) was added and the reaction mixture was heated to 100 °C for 2.5 h. After cooling to room temperature, the reaction was quenched with water (20 mL). The aqueous layer was extracted with ethyl acetate (3×30 mL), and the organic layers were combined, washed with water and brine, dried over anhydrous Na<sub>2</sub>SO<sub>4</sub>, and filtered. The solvent was evaporated under vacuum, and the resultant residue was purified by flash column chromatography using the proper eluent to afford the target compounds in pure form.

##### 1.3.1. 1-(6-(2-Methoxyphenyl)benzo[d]thiazol-2-yl)-3-(4-(4-methylpiperazin-1-yl)phenyl)urea (**2a**)

Column chromatography was performed using 5% methanol in DCM. White solid (28.1% yield); <sup>1</sup>H NMR (400 MHz, CDCl<sub>3</sub>) δ 7.88 (s, 1H), 7.73 (d, *J* = 8.4 Hz, 1H), 7.54 (d, *J* = 7.6 Hz, 1H), 7.36–7.31 (m, 4H), 7.05–6.99 (m, 2H), 6.86 (d, *J* = 8.4 Hz, 2H), 3.82 (s, 3H), 3.17 (t, *J* = 5.0 Hz, 4H), 2.61 (t, *J* = 4.6 Hz, 4H), 2.38 (s, 3H); <sup>13</sup>C NMR (100 MHz, CDCl<sub>3</sub>) δ 161.4, 156.5, 152.8, 148.3, 147.8, 134.1, 131.0, 130.9, 130.0, 129.8, 128.7, 128.1, 122.2, 122.1, 121.0, 119.3, 116.8, 111.3, 55.6, 55.0, 49.3, 46.0; HRMS (FAB) *m/z* calcd for C<sub>26</sub>H<sub>28</sub>N<sub>5</sub>O<sub>2</sub>S [M+H]<sup>+</sup>: 474.1963, found: 474.1960.

##### 1.3.2. 1-(4-(4-Ethylpiperazin-1-yl)phenyl)-3-(6-(2-methoxyphenyl)benzo[d]thiazol-2-yl)urea (**2b**)

Column chromatography was performed using 3–7% methanol in dichloromethane (DCM). White solid (23.1% yield); <sup>1</sup>H NMR (400 MHz, CDCl<sub>3</sub>) δ 10.77 (br. s, 1H), 7.87 (s, 1H), 7.71 (d, *J* = 8.0 Hz, 1H), 7.52 (d, *J* = 7.6 Hz, 1H), 7.32–7.26 (m, 4H), 7.04–6.97 (m, 2H), 6.83 (d, *J* = 7.6 Hz, 2H), 3.81 (s, 3H), 3.14 (s, 4H), 2.59 (s, 4H), 2.48 (q, *J* = 6.9 Hz, 2H), 1.13 (t, *J* = 6.4 Hz, 3H); <sup>13</sup>C NMR (100 MHz, CDCl<sub>3</sub>) δ 161.5, 156.5, 152.8, 148.4, 147.7, 134.1, 131.1, 130.0, 129.8, 128.7, 128.1, 122.1, 122.0, 121.9, 121.0, 119.2, 116.7, 111.3, 55.6, 52.8, 52.4, 49.5, 12.0; HRMS (FAB) *m/z* calcd for C<sub>27</sub>H<sub>30</sub>N<sub>5</sub>O<sub>2</sub>S [M+H]<sup>+</sup>: 488.2120, found: 488.2117.

##### 1.3.3. 1-(6-(2-Methoxyphenyl)benzo[d]thiazol-2-yl)-3-(4-morpholinophenyl)urea (**2c**)

Column chromatography was performed using 3–7% methanol in DCM. White solid (23% yield); <sup>1</sup>H NMR (400 MHz, DMSO-*d*<sub>6</sub>) δ 10.85 (br. s, 1H), 8.96 (s, 1H), 7.98 (s, 1H), 7.67 (d, *J* = 8.4 Hz, 1H), 7.50 (d, *J* = 7.6 Hz, 1H), 7.39–7.34 (m, 4H), 7.14 (d, *J* = 8.4 Hz, 1H), 7.05 (t, *J* = 7.2 Hz, 1H), 6.93 (d, *J* = 8.8 Hz, 2H), 3.79 (s, 3H), 3.36 (s, 4H), 3.09 (s, 4H); <sup>13</sup>C NMR (100 MHz, DMSO-*d*<sub>6</sub>) δ 160.4, 156.6, 152.6, 147.8, 133.4, 131.6, 131.1, 130.6, 130.1, 129.2, 128.0, 122.4, 121.3, 120.8, 119.1, 116.5, 116.4, 112.2, 60.8, 59.0, 56.0.

##### 1.3.4. 1-(6-(2-Methoxyphenyl)benzo[d]thiazol-2-yl)-3-(3-(trifluoromethyl)phenyl)urea (**2d**)

Column chromatography was performed using ethyl acetate-hexane (1:3, v/v). White solid (43% yield); <sup>1</sup>H NMR (400 MHz, DMSO-*d*<sub>6</sub>) δ 11.27 (br. s, 1H), 9.59 (s, 1H), 8.09 (s, 1H), 7.99 (s, 1H), 7.76 (d, *J* = 8.4 Hz, 1H), 7.66 (d, *J* = 8.4 Hz, 1H), 7.58 (t, *J* = 8.0 Hz, 1H), 7.52 (dd, *J* = 8.4, 1.2 Hz, 1H), 7.41 (d, *J* = 7.6 Hz, 1H), 7.36 (s, 1H), 7.34 (s, 1H), 7.13 (d, *J* = 8.4 Hz, 1H), 7.05 (t, *J* = 7.4 Hz, 1H), 3.79 (s, 3H); <sup>13</sup>C NMR (100 MHz, DMSO-*d*<sub>6</sub>) δ 156.6, 140.2, 133.7, 132.5, 131.0, 130.5, 130.3, 130.0, 129.9, 129.2, 128.2, 126.0, 123.3, 123.0, 122.6, 121.3, 119.6, 119.5, 115.3, 115.3, 112.2, 56.0; HRMS (FAB) *m/z* calcd for C<sub>22</sub>H<sub>17</sub>F<sub>3</sub>N<sub>3</sub>O<sub>2</sub>S [M+H]<sup>+</sup>: 444.0993, found: 444.0992.

#### 1.3.5. 1-(3,5-Bis(trifluoromethyl)phenyl)-3-(6-(2-methoxyphenyl)benzo[d]thiazol-2-yl)urea (**2e**)

Column chromatography was performed using 1% methanol in DCM. White solid (76% yield); <sup>1</sup>H NMR (400 MHz, DMSO-*d*<sub>6</sub>) δ 11.89 (br. s, 1H), 9.96 (s, 1H), 8.31 (s, 2H), 7.96 (s, 1H), 7.71 (s, 1H), 7.62 (d, *J* = 8.0 Hz, 1H), 7.52 (dd, *J* = 8.4, 1.2 Hz, 1H), 7.35 (d, *J* = 8.0 Hz, 2H), 7.14 (d, *J* = 8.0 Hz, 1H), 7.05 (t, *J* = 7.4 Hz, 1H), 3.79 (s, 3H); <sup>13</sup>C NMR (100 MHz, DMSO-*d*<sub>6</sub>) δ 156.6, 141.9, 133.8, 131.7, 131.4, 131.1, 131.0, 130.7, 129.9, 129.3, 128.4, 125.1, 122.8, 122.4, 121.3, 119.0, 115.6, 112.2, 56.0; HRMS (FAB) *m/z* calcd for C<sub>23</sub>H<sub>16</sub>F<sub>6</sub>N<sub>3</sub>O<sub>2</sub>S [M+H]<sup>+</sup>: 512.0867, found: 512.0866.

#### 1.3.6. 1-(6-(2-Methoxyphenyl)benzo[d]thiazol-2-yl)-3-(4-(morpholinomethyl)-3-(trifluoromethyl)phenyl)urea (**2f**)

Column chromatography was performed using ethyl acetate-hexane (1:1, v/v). Yellow solid (18.4% yield); <sup>1</sup>H NMR (400 MHz, CDCl<sub>3</sub>) δ 7.94 (d, *J* = 1.6 Hz, 1H), 7.91 (br. s, 1H), 7.84–7.73 (m, 3H), 7.63 (dd, *J* = 8.4, 1.6 Hz, 1H), 7.40–7.36 (m, 2H), 7.09 (d, *J* = 7.2 Hz, 1H), 7.04 (d, *J* = 8.8 Hz, 1H), 3.87 (s, 3H), 3.76 (t, *J* = 4.4 Hz, 4H), 3.66 (s, 2H), 2.52 (t, *J* = 4.4 Hz, 4H); <sup>13</sup>C NMR (100 MHz, CDCl<sub>3</sub>) δ 161.4, 156.5, 152.8, 148.4, 147.8, 134.3, 134.1, 131.0, 131.0, 130.1, 129.7, 128.8, 128.7, 128.2, 128.1, 122.3, 122.1, 121.0, 119.3, 116.8, 111.3, 55.6, 55.0, 49.3, 46.0; HRMS (FAB) *m/z* calcd for C<sub>27</sub>H<sub>26</sub>F<sub>3</sub>N<sub>4</sub>O<sub>3</sub>S [M+H]<sup>+</sup>: 543.1677, found: 543.1681.

### 1.4. In vitro biological evaluations

#### 1.4.1. In vitro kinase screening

Reaction Biology Corporation (RBC) Kinase HotSpot<sup>SM</sup> service was employed for biochemical kinase evaluation of the target compounds following the reported assay protocol <sup>5</sup>.

#### 1.4.2. In vitro cell based assays

##### 1.4.2.1. Preliminary MTT evaluation of antiproliferative activity

The antiproliferative activity of the target benzothiazoles was assessed against human leukemia K562 cancer cell as well as L132 normal cell line, using the MTT assay adopting the reported assay protocols <sup>6</sup>.

##### 1.4.2.2. Anti-cancer screening at NCI

The anticancer screening of certain selected target compounds over a full panel of 60-human cancer cell lines was conducted at the National Cancer Institute (NCI), Bethesda, Maryland, USA using Sulforhodamine B (SRB) assay adopting the standard protocol <sup>7</sup>.

### 1.5. In silico studies

#### 1.5.1. Molecular docking

The docking models of compound **2b** were constructed utilizing the X-ray crystal structure of BCR-ABL<sup>WT</sup> (PDB: 2GQG) <sup>8</sup> or BCR-ABL<sup>T315I</sup> (PDB: 2Z60) <sup>9</sup>, in its DFG-in conformation using Discovery Studio 2022 (DS). The protein structure of BCR-ABL<sup>WT</sup> and BCR-ABL<sup>T315I</sup> were prepared for docking by employing protocol “prepare protein”, and ligands were prepared through protonation at pH 7.4 and energy minimization. The binding site was defined based on the ligand interactions with BCR-ABL kinase domain. The ligands were docked into the defined binding sites using the CDocker algorithm, and the ligand pose with the best score was selected for analysis of the binding mode.

#### 1.5.2. Bioavailability Prediction

The bioavailability prediction of compound **2b** was assessed at <http://www.swissadme.ch/index.php> (accessed on 10 December 2022).

## 2) $^1\text{H}$ NMR and $^{13}\text{C}$ NMR spectra

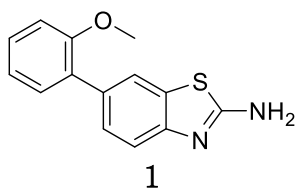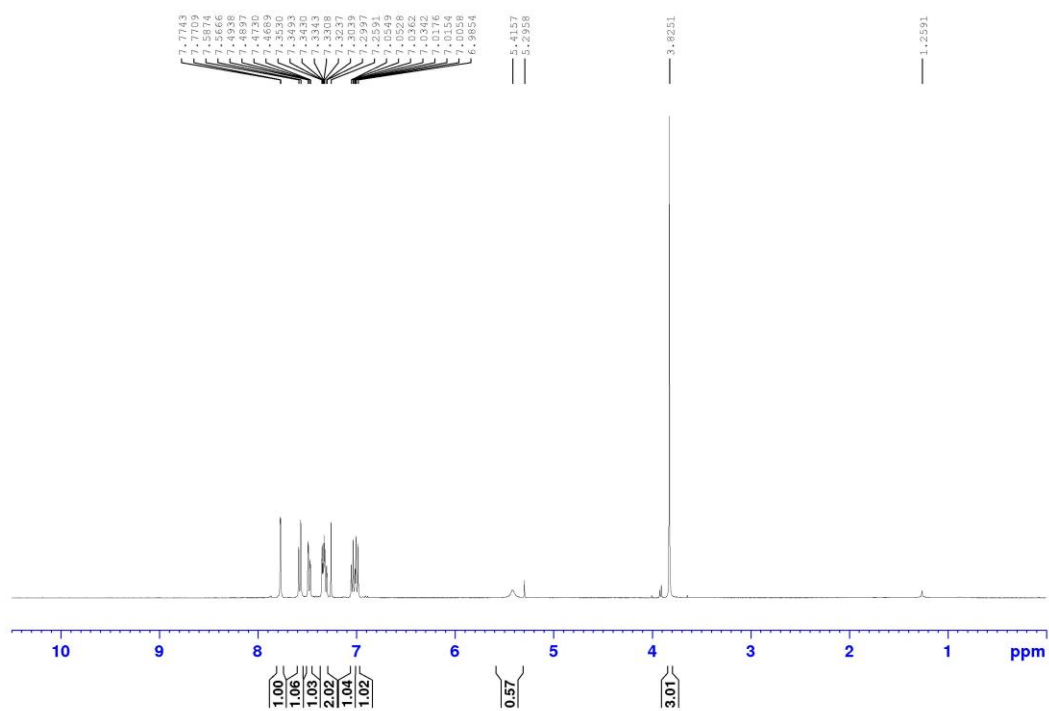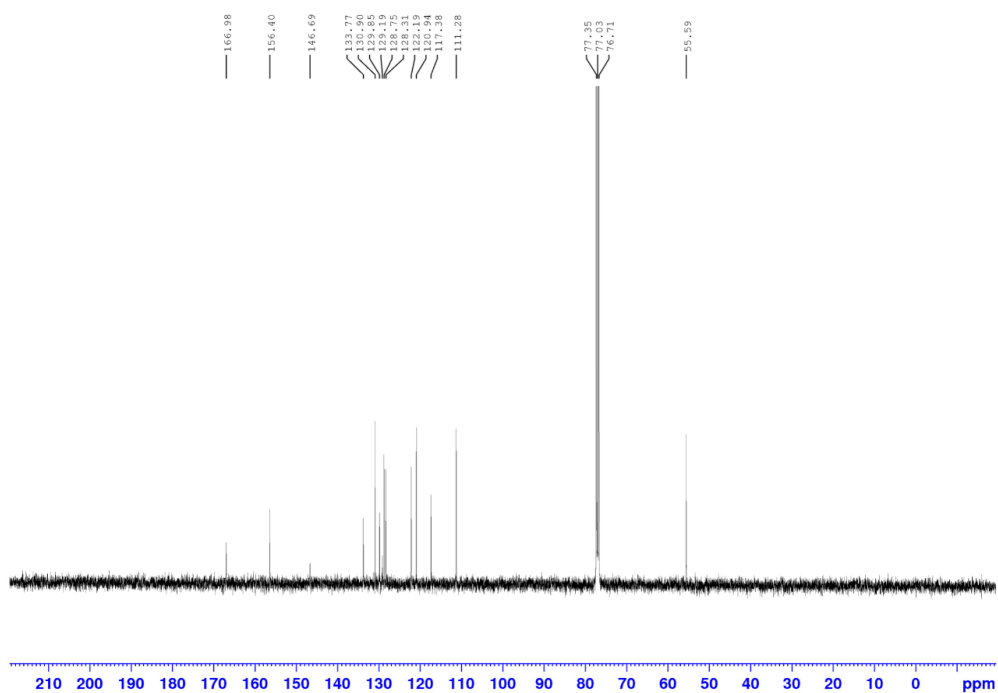

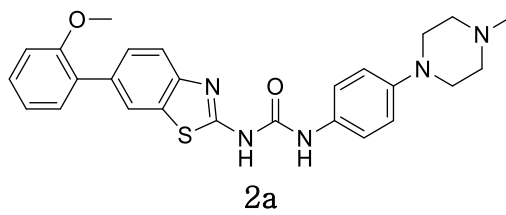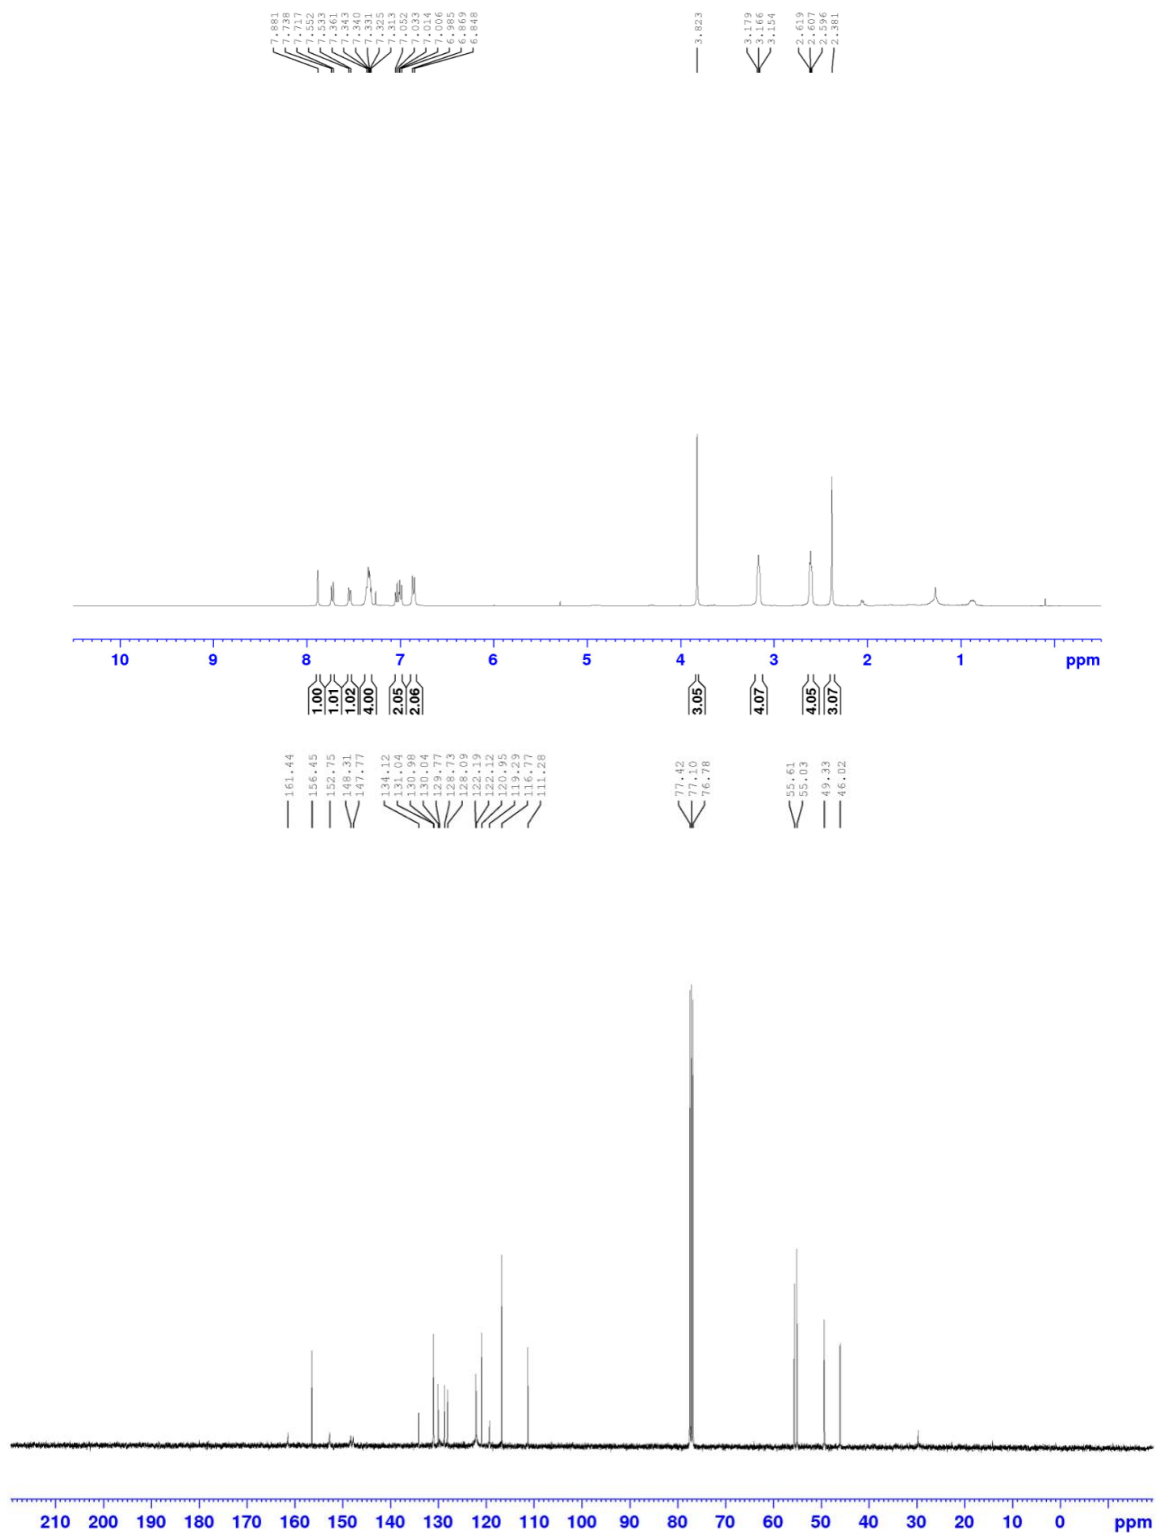

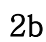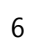

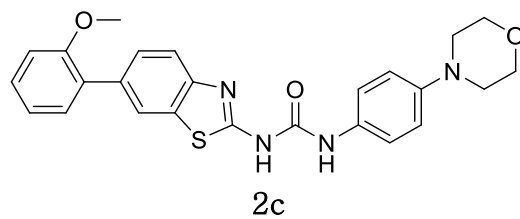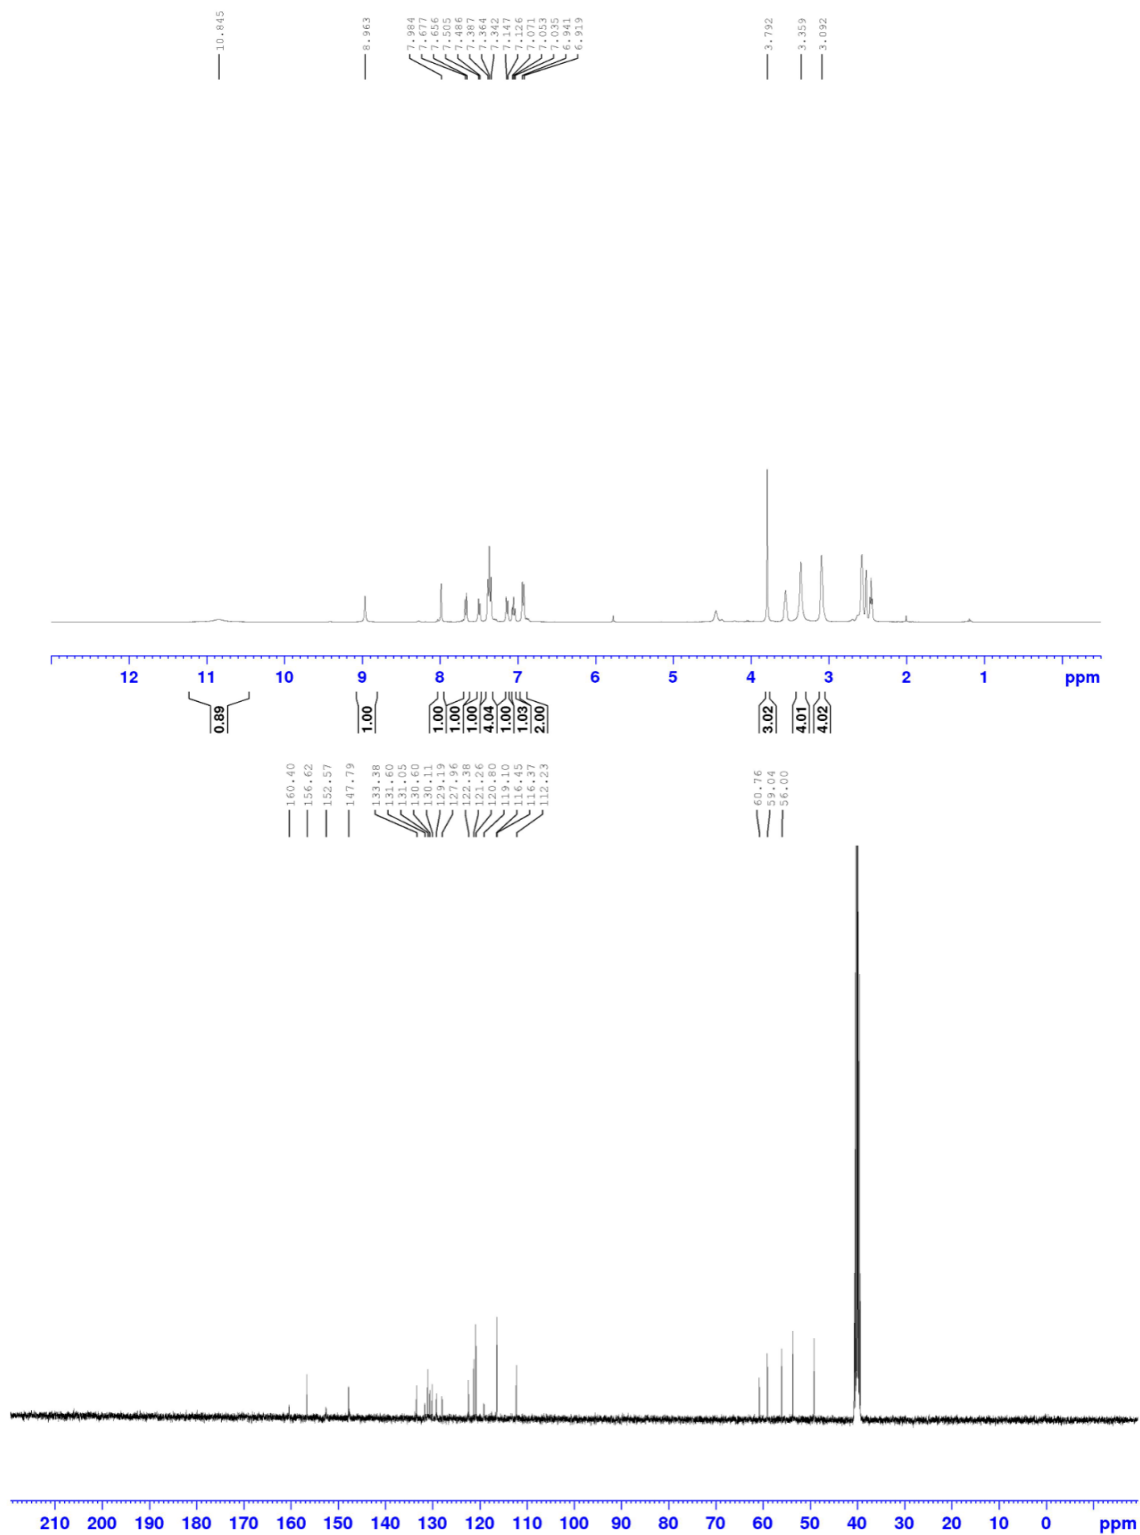

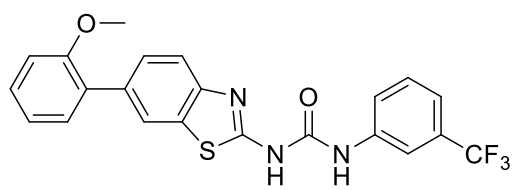

2d

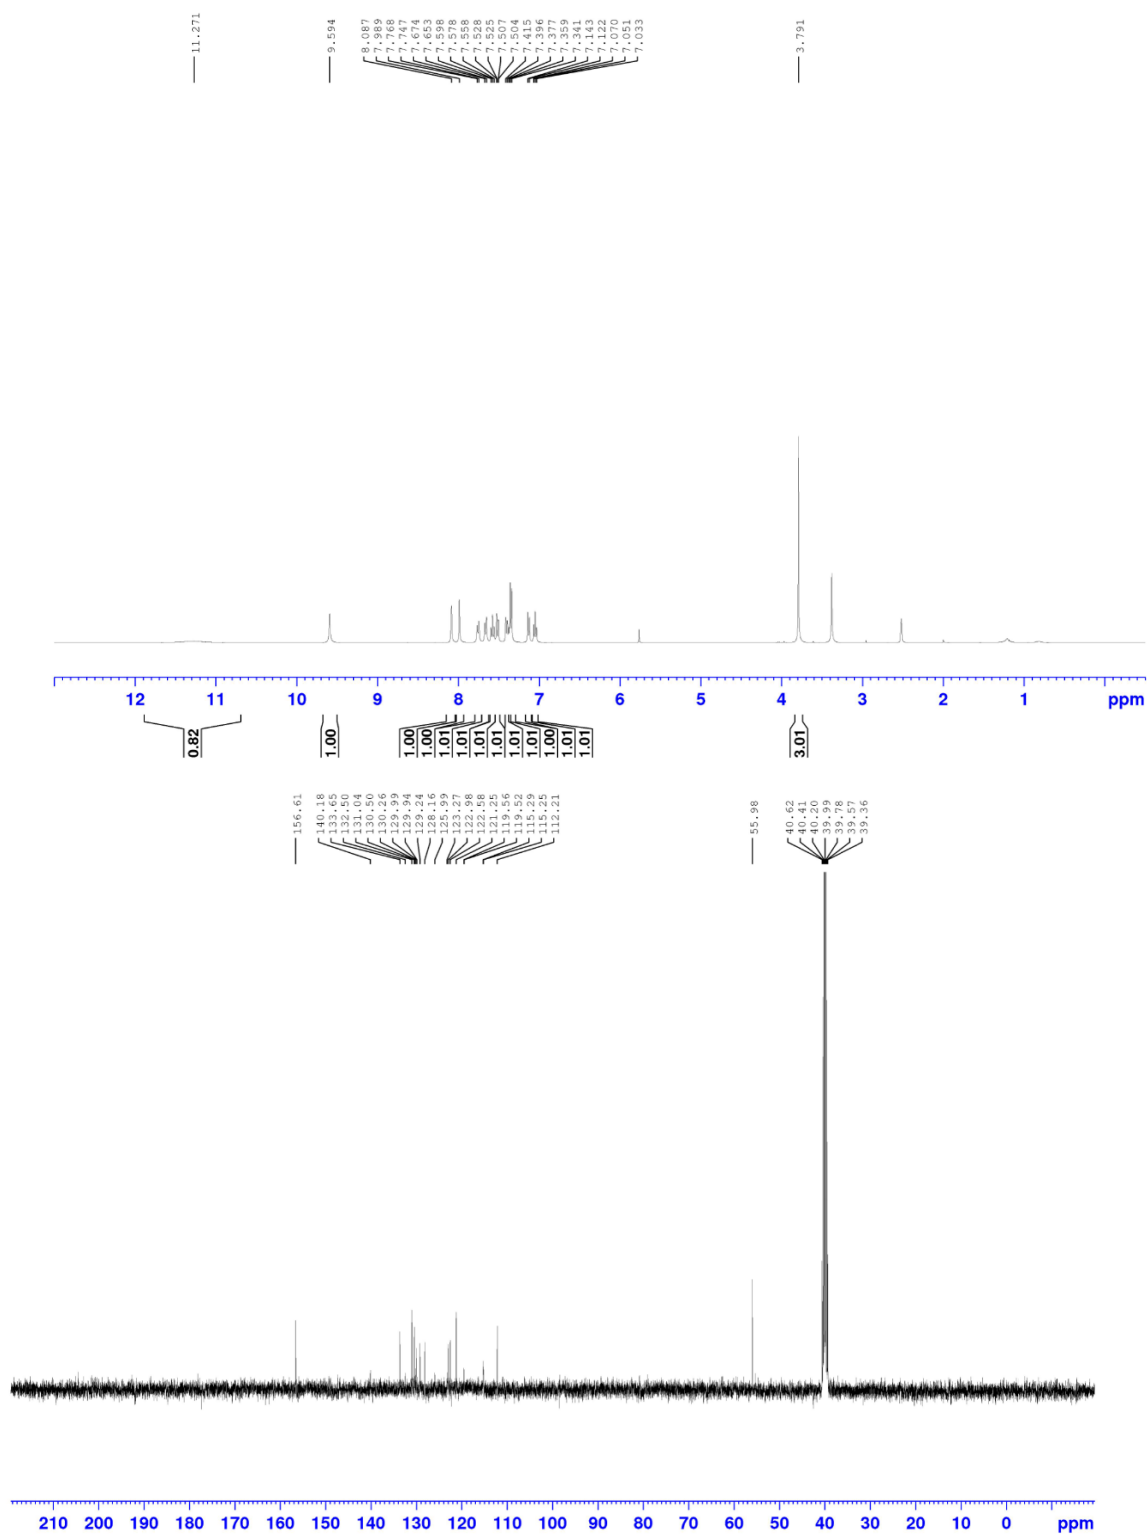



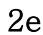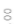

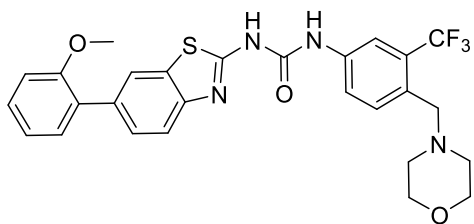

2f

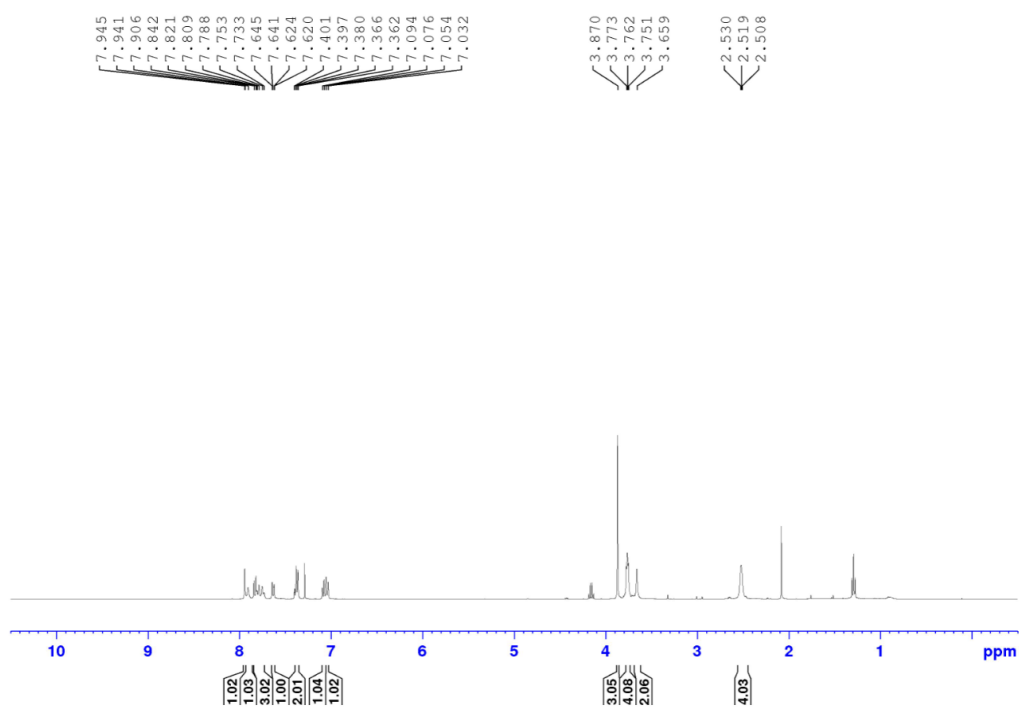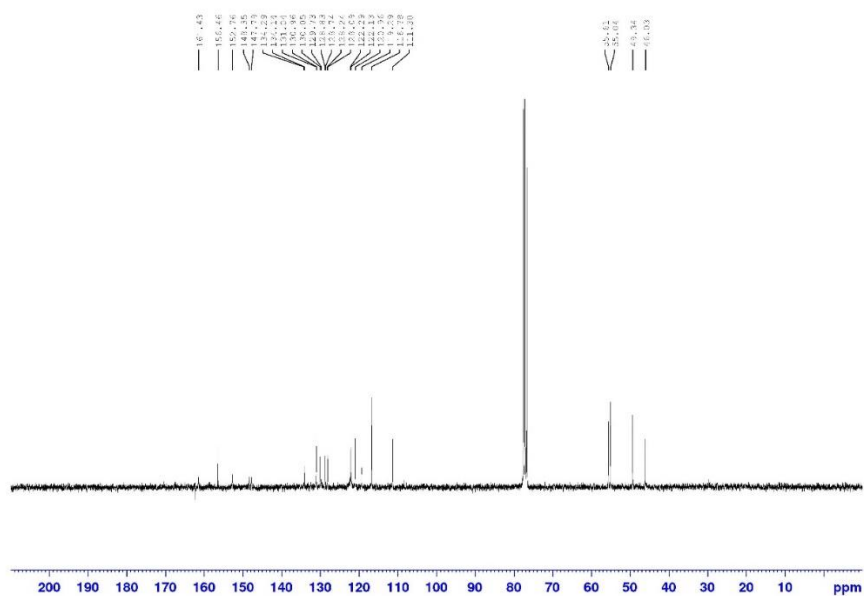

### 3) HRMS charts

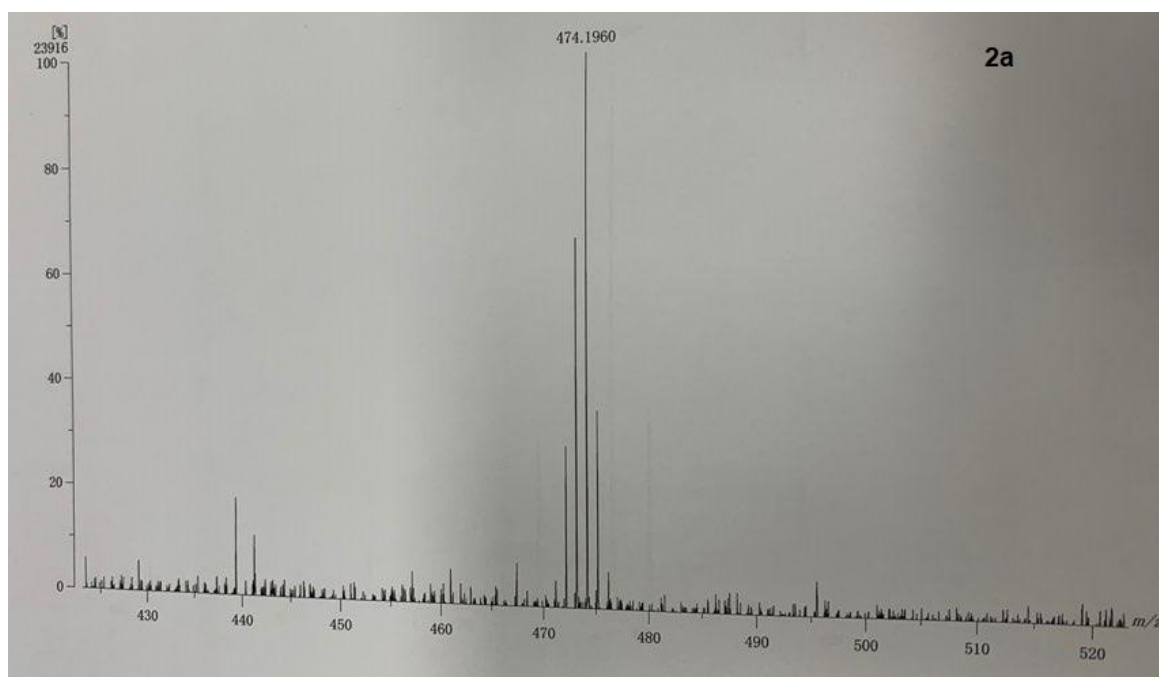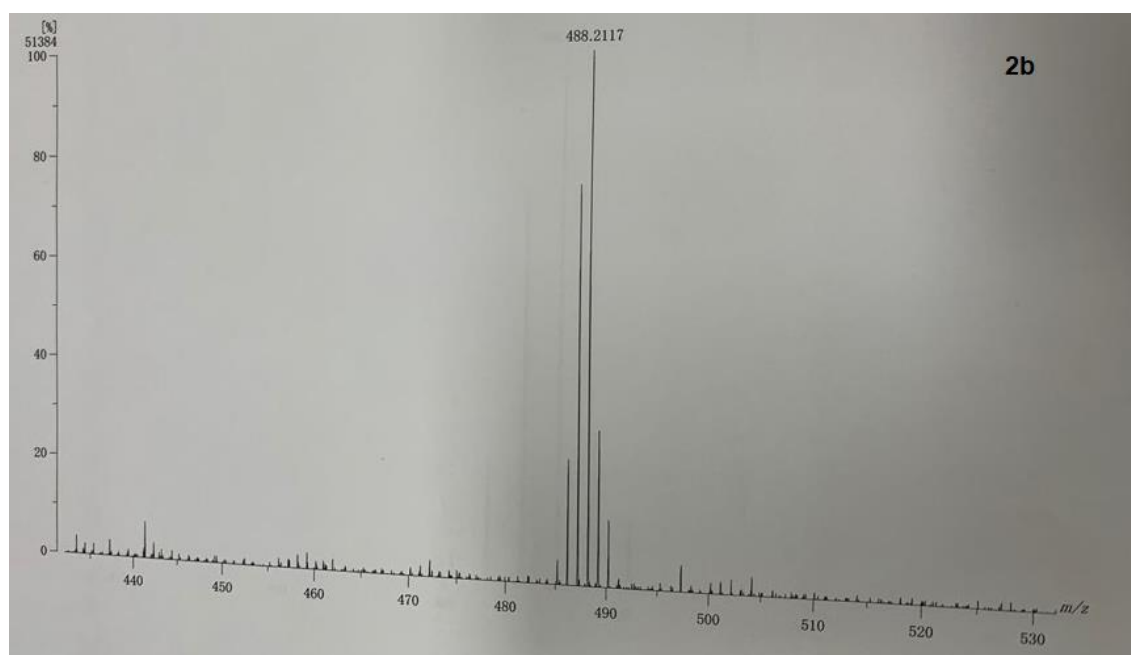

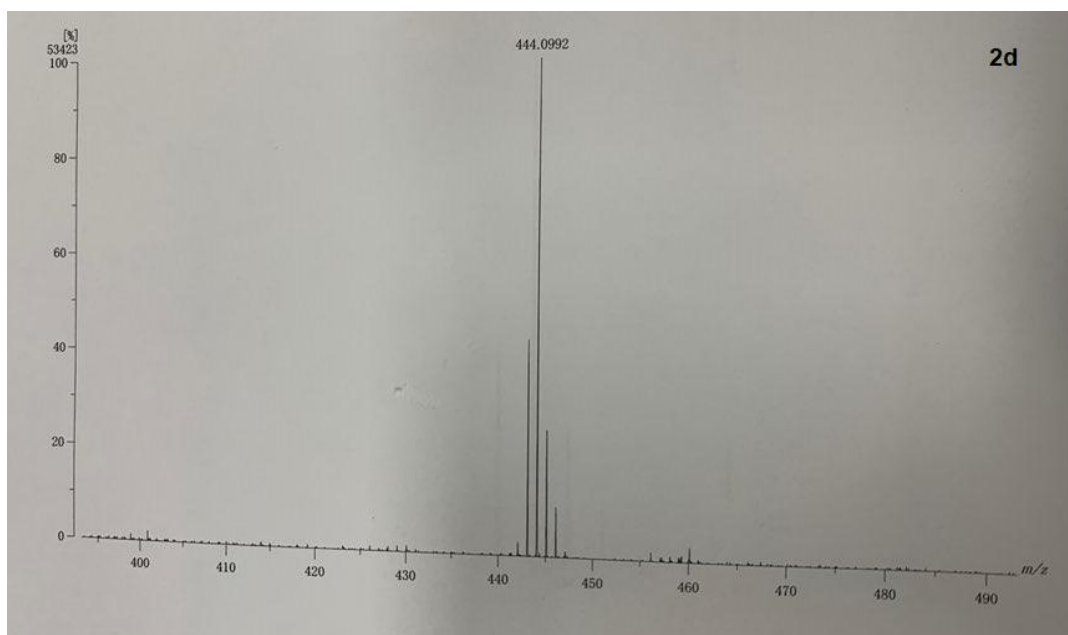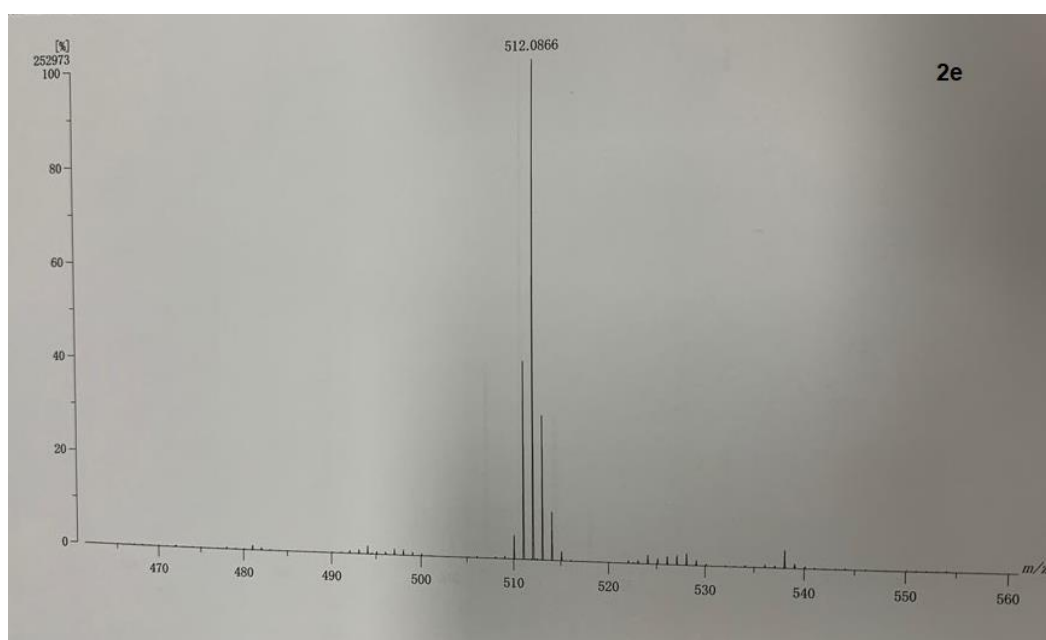

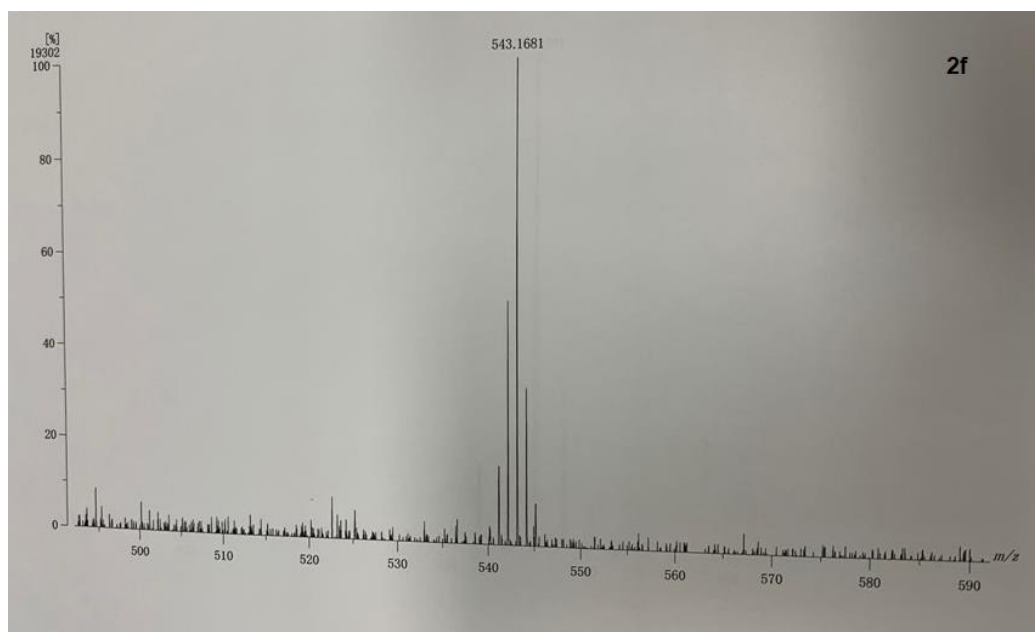

#### 4) 2D binding mode & bioavailability radar of 2b

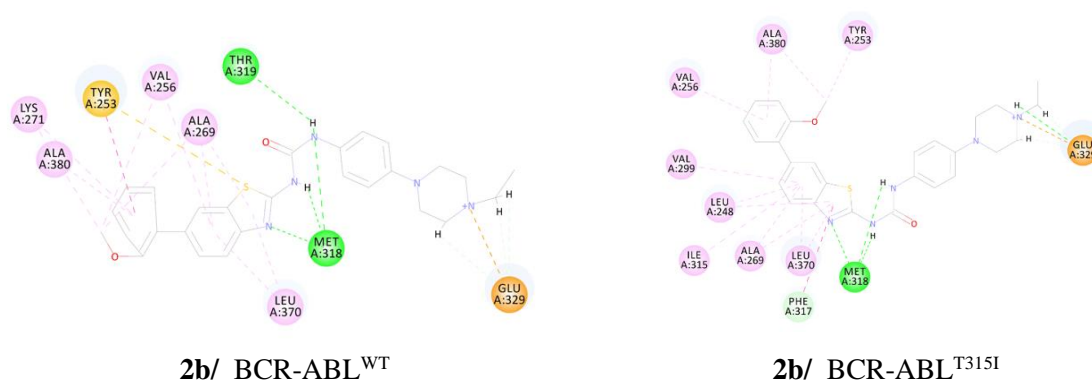

**Figure S1.** 2D binding mode of compound **2b** with BCR-ABL<sup>WT</sup> and BCR-ABL<sup>T315I</sup>. Various interactions are depicted by different color legends. The inhibitor is shown by line, interacting residues by colored sphere, and interactions by dash lines.

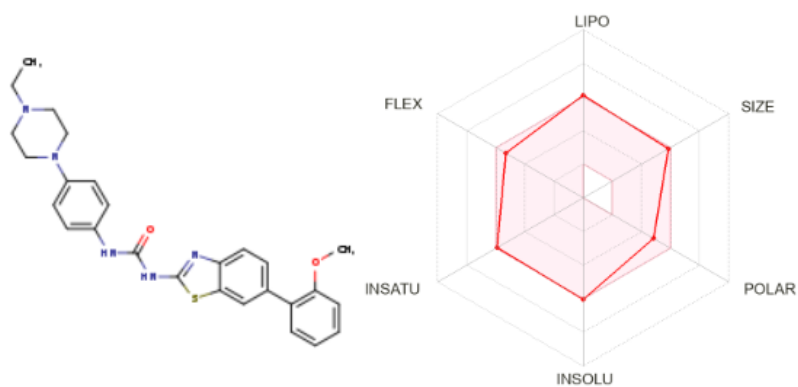

**Figure S2.** The bioavailability radar of **2b**.

## 5) NCI data

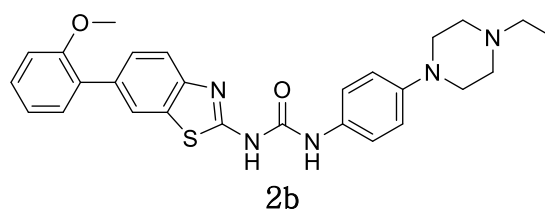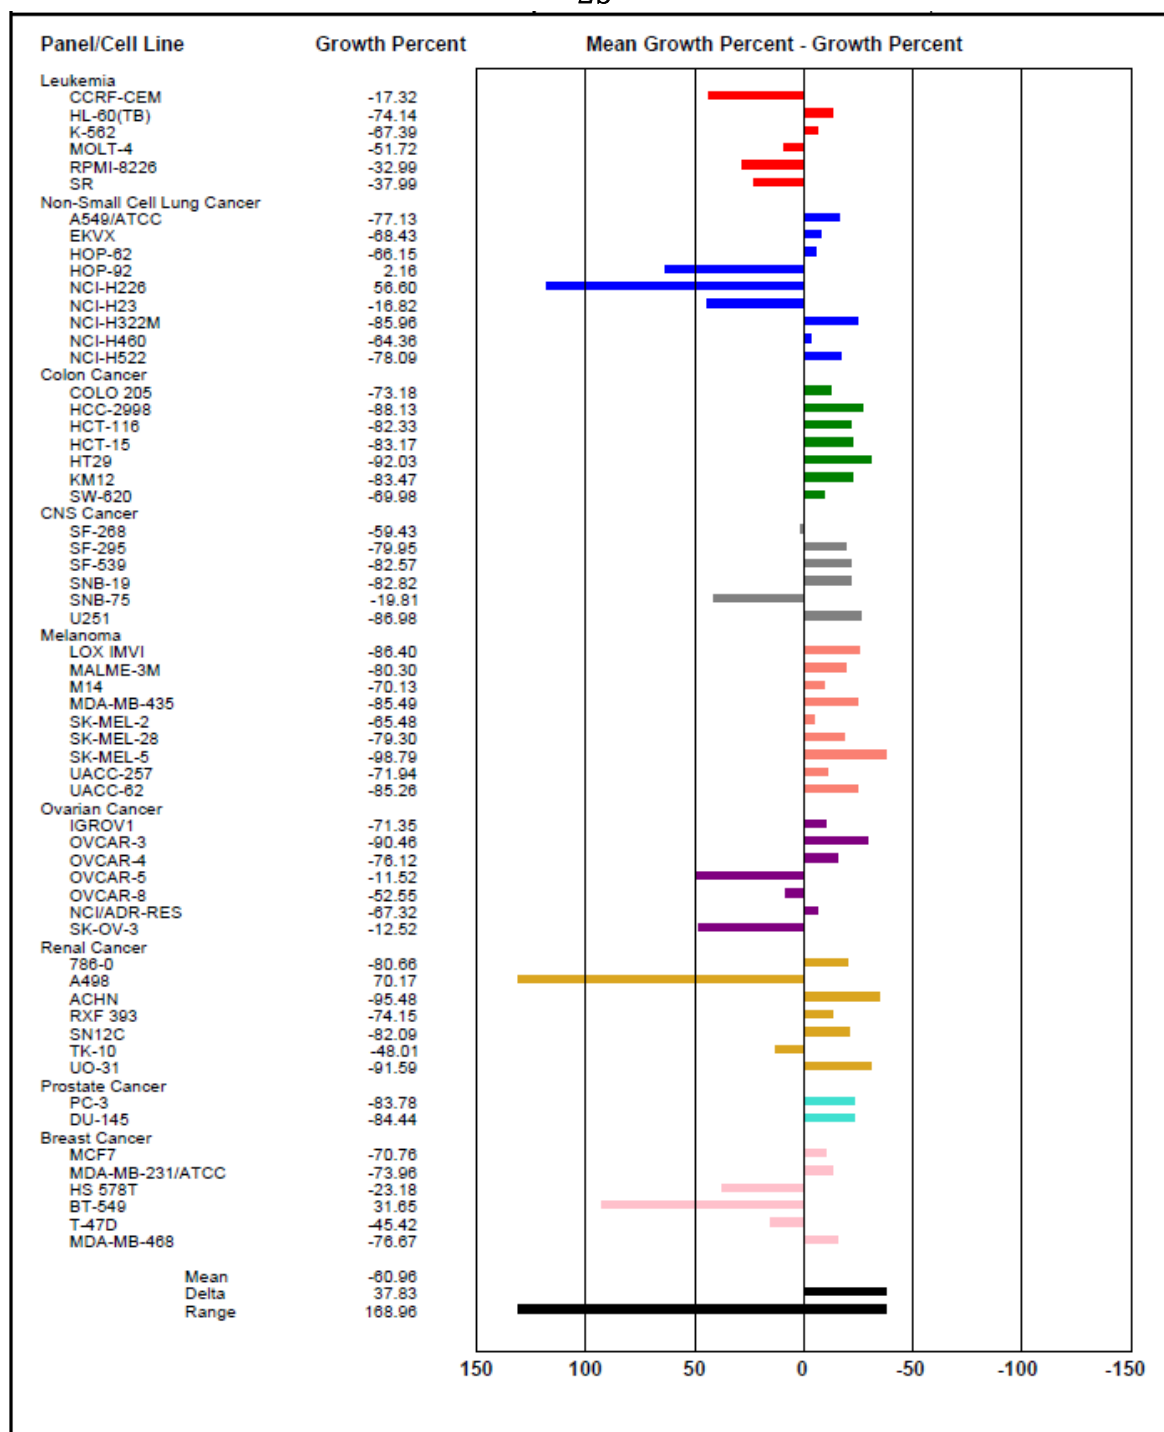

| Panel/Cell Line            | Time Zero | Ctrl  | Log10 Concentration |       |       |        |        | Percent Growth |      |      |      |      | GI50    | TGI     | LC50      |  |
|----------------------------|-----------|-------|---------------------|-------|-------|--------|--------|----------------|------|------|------|------|---------|---------|-----------|--|
|                            |           |       | -8.0                | -7.0  | -6.0  | -5.0   | -4.0   | -8.0           | -7.0 | -6.0 | -5.0 | -4.0 |         |         |           |  |
| Leukemia                   |           |       |                     |       |       |        |        |                |      |      |      |      |         |         |           |  |
| CRRF-CEM                   | 0.823     | 2.866 | 2.809               | 2.829 | 2.564 | 0.282  | 0.220  | 97             | 98   | 87   | -55  | -65  | 1.81E-6 | 4.09E-6 | 9.25E-6   |  |
| HL-60(TB)                  | 0.842     | 2.792 | 2.774               | 2.804 | 2.553 | 0.246  | 0.269  | 99             | 101  | 88   | -71  | -68  | 1.73E-6 | 3.58E-6 | 7.39E-6   |  |
| K-562                      | 0.226     | 2.152 | 2.181               | 1.885 | 0.397 | 0.088  | 0.137  | 101            | 86   | 9    | -61  | -40  | 2.93E-7 | 1.34E-6 |           |  |
| MOLT-4                     | 0.803     | 2.983 | 2.942               | 3.017 | 2.783 | 0.235  | 0.268  | 99             | 103  | 92   | -71  | -67  | 1.80E-6 | 3.67E-6 | 7.45E-6   |  |
| RPMI-8226                  | 0.767     | 2.814 | 2.709               | 2.712 | 2.517 | 0.397  | 0.318  | 105            | 105  | 95   | -48  | -59  | 2.06E-6 | 4.60E-6 | 1.48E-5   |  |
| SR                         | 0.367     | 1.200 | 1.123               | 1.150 | 1.001 | 0.206  | 0.227  | 91             | 94   | 76   | -44  | -38  | 1.65E-6 | 4.31E-6 | > 1.00E-4 |  |
| Non-Small Cell Lung Cancer |           |       |                     |       |       |        |        |                |      |      |      |      |         |         |           |  |
| A549/ATCC                  | 0.524     | 2.482 | 2.454               | 2.560 | 2.628 | 0.073  | 0.036  | 99             | 104  | 107  | -86  | -93  | 1.98E-6 | 3.59E-6 | 6.51E-6   |  |
| EKVX                       | 0.747     | 2.375 | 2.146               | 2.157 | 2.028 | 0.147  | 0.139  | 86             | 87   | 79   | -80  | -81  | 1.51E-6 | 3.12E-6 | 6.44E-6   |  |
| HOP-92                     | 1.233     | 1.968 | 1.893               | 1.873 | 1.752 | 0.586  | 0.406  | 90             | 87   | 71   | -52  | -67  | 1.47E-6 | 3.75E-6 | 9.55E-6   |  |
| NCI-H226                   | 1.055     | 2.311 | 2.314               | 2.328 | 2.283 | 0.512  | 0.415  | 100            | 101  | 98   | -52  | -61  | 2.09E-6 | 4.52E-6 | 9.77E-6   |  |
| NCI-H23                    | 0.861     | 2.162 | 2.091               | 2.004 | 1.909 | 0.233  | 0.076  | 95             | 90   | 83   | -65  | -69  | 1.07E-6 | 3.65E-6 | 7.94E-6   |  |
| NCI-H223M                  | 1.063     | 2.402 | 2.367               | 2.234 | 2.149 | 0.133  | -0.020 | 97             | 87   | 81   | -87  | -100 | 1.53E-6 | 3.03E-6 | 5.99E-6   |  |
| NCI-H460                   | 0.337     | 3.047 | 3.123               | 3.194 | 2.965 | 0.028  | -0.006 | 103            | 105  | 97   | -92  | -100 | 1.77E-6 | 3.27E-6 | 6.01E-6   |  |
| NCI-H522                   | 1.256     | 2.983 | 2.765               | 2.786 | 2.812 | 0.308  | 0.196  | 87             | 89   | 90   | -76  | -84  | 1.75E-6 | 3.50E-6 | 7.01E-6   |  |
| Colon Cancer               |           |       |                     |       |       |        |        |                |      |      |      |      |         |         |           |  |
| COLO 205                   | 0.670     | 2.527 | 2.411               | 2.504 | 2.539 | 0.192  | 0.104  | 94             | 99   | 101  | -71  | -85  | 1.97E-6 | 3.85E-6 | 7.51E-6   |  |
| HCC-2998                   | 0.631     | 2.454 | 2.350               | 2.366 | 2.430 | 0.080  | 0.036  | 94             | 95   | 99   | -87  | -94  | 1.83E-6 | 3.39E-6 | 6.30E-6   |  |
| HCT-116                    | 0.243     | 2.129 | 2.110               | 2.193 | 1.862 | 0.016  | -0.022 | 99             | 103  | 86   | -94  | -100 | 1.58E-6 | 3.01E-6 | 5.71E-6   |  |
| HCT-15                     | 0.225     | 1.765 | 1.803               | 1.628 | 1.195 | 0.006  | -0.043 | 89             | 91   | 83   | -98  | -100 | 1.20E-6 | 2.47E-6 | 5.06E-6   |  |
| HT29                       | 0.362     | 2.517 | 2.453               | 2.369 | 1.842 | 0.035  | 0.002  | 97             | 93   | 89   | -90  | -100 | 1.31E-6 | 2.70E-6 | 5.57E-6   |  |
| KM12                       | 0.508     | 2.744 | 2.797               | 2.812 | 2.604 | 0.073  | 0.067  | 102            | 103  | 94   | -86  | -87  | 1.75E-6 | 3.33E-6 | 6.33E-6   |  |
| SW-620                     | 0.331     | 2.097 | 2.089               | 2.223 | 2.189 | 0.046  | 0.008  | 100            | 107  | 105  | -86  | -98  | 1.94E-6 | 3.55E-6 | 6.48E-6   |  |
| CNS Cancer                 |           |       |                     |       |       |        |        |                |      |      |      |      |         |         |           |  |
| SF-268                     | 0.709     | 2.297 | 2.189               | 2.198 | 2.256 | 0.166  | 0.156  | 93             | 94   | 97   | -77  | -78  | 1.87E-6 | 3.63E-6 | 7.03E-6   |  |
| SF-295                     | 0.631     | 2.340 | 2.133               | 2.247 | 2.207 | 0.027  | 0.020  | 88             | 95   | 92   | -96  | -97  | 1.68E-6 | 3.09E-6 | 5.71E-6   |  |
| SF-539                     | 0.873     | 2.525 | 2.346               | 2.386 | 2.306 | 0.059  | 0.017  | 89             | 92   | 87   | -93  | -98  | 1.80E-6 | 3.03E-6 | 5.75E-6   |  |
| SNB-19                     | 0.758     | 2.517 | 2.535               | 2.624 | 2.691 | 0.111  | 0.022  | 101            | 106  | 110  | -85  | -97  | 2.03E-6 | 3.65E-6 | 6.59E-6   |  |
| SNB-75                     | 0.762     | 1.768 | 1.604               | 1.640 | 1.562 | 0.027  | 0.009  | 83             | 87   | 81   | -97  | -99  | 1.49E-6 | 2.86E-6 | 5.46E-6   |  |
| U251                       | 0.534     | 2.305 | 2.311               | 2.372 | 2.061 | 0.013  | -0.030 | 100            | 104  | 86   | -96  | -100 | 1.57E-6 | 2.94E-6 | 5.51E-6   |  |
| Melanoma                   |           |       |                     |       |       |        |        |                |      |      |      |      |         |         |           |  |
| LOX IMVI                   | 0.364     | 2.746 | 2.579               | 2.588 | 2.568 | 0.029  | 0.012  | 93             | 93   | 93   | -92  | -97  | 1.70E-6 | 3.17E-6 | 5.92E-6   |  |
| MALME-3M                   | 0.701     | 1.183 | 1.146               | 1.136 | 1.136 | 0.128  | 0.050  | 92             | 90   | 90   | -84  | -93  | 1.71E-6 | 3.34E-6 | 6.54E-6   |  |
| M14                        | 0.514     | 1.903 | 1.867               | 1.891 | 1.748 | 0.023  | -0.006 | 97             | 99   | 89   | -96  | -100 | 1.62E-6 | 3.03E-6 | 5.66E-6   |  |
| MDA-MB-435                 | 0.454     | 2.584 | 2.464               | 2.491 | 2.470 | 0.018  | -0.018 | 94             | 96   | 95   | -96  | -100 | 1.71E-6 | 3.14E-6 | 5.74E-6   |  |
| SK-MEL-2                   | 1.090     | 2.445 | 2.410               | 2.484 | 2.491 | 0.195  | 0.232  | 97             | 103  | 103  | -82  | -79  | 1.94E-6 | 3.61E-6 | 6.71E-6   |  |
| SK-MEL-28                  | 0.836     | 2.202 | 2.080               | 2.153 | 2.141 | 0.077  | -0.001 | 92             | 96   | 96   | -91  | -100 | 1.76E-6 | 3.26E-6 | 6.04E-6   |  |
| SK-MEL-5                   | 0.616     | 3.329 | 3.238               | 3.339 | 3.235 | 0.012  | -0.027 | 96             | 100  | 96   | -99  | -100 | 1.73E-6 | 3.12E-6 | 6.53E-6   |  |
| UACC-257                   | 1.087     | 2.289 | 2.286               | 2.393 | 2.433 | 0.188  | 0.109  | 100            | 110  | 114  | -83  | -90  | 2.11E-6 | 3.79E-6 | 6.81E-6   |  |
| UACC-62                    | 0.929     | 2.892 | 2.879               | 2.802 | 2.912 | 0.122  | 0.034  | 99             | 95   | 101  | -87  | -96  | 1.87E-6 | 3.45E-6 | 6.36E-6   |  |
| Ovarian Cancer             |           |       |                     |       |       |        |        |                |      |      |      |      |         |         |           |  |
| IGROV1                     | 0.481     | 1.995 | 2.007               | 2.074 | 1.953 | 0.110  | 0.043  | 101            | 105  | 97   | -77  | -91  | 1.87E-6 | 3.61E-6 | 6.99E-6   |  |
| OVCA-3                     | 0.459     | 1.788 | 1.837               | 1.854 | 1.837 | 0.040  | 0.033  | 104            | 105  | 89   | -91  | -93  | 1.64E-6 | 3.11E-6 | 5.90E-6   |  |
| OVCA-4                     | 0.710     | 1.555 | 1.481               | 1.516 | 1.455 | 0.133  | 0.044  | 91             | 95   | 88   | -81  | -94  | 1.68E-6 | 3.31E-6 | 6.53E-6   |  |
| OVCA-5                     | 0.789     | 1.857 | 1.664               | 1.793 | 1.820 | 0.108  | 0.017  | 82             | 94   | 97   | -86  | -98  | 1.80E-6 | 3.37E-6 | 6.33E-6   |  |
| OVCA-8                     | 0.593     | 2.439 | 2.483               | 2.635 | 2.558 | 0.105  | 0.091  | 102            | 111  | 106  | -82  | -90  | 1.99E-6 | 3.66E-6 | 6.74E-6   |  |
| NCIADR-RES                 | 0.529     | 2.011 | 1.965               | 1.933 | 1.867 | 0.098  | 0.058  | 96             | 95   | 80   | -97  | -99  | 1.72E-6 | 3.25E-6 | 6.55E-6   |  |
| SK-OV-3                    | 1.160     | 2.536 | 2.431               | 2.492 | 2.433 | 0.290  | -0.007 | 92             | 97   | 92   | -75  | -100 | 1.79E-6 | 3.55E-6 | 7.05E-6   |  |
| Renal Cancer               |           |       |                     |       |       |        |        |                |      |      |      |      |         |         |           |  |
| 786-O                      | 0.745     | 2.694 | 2.581               | 2.728 | 2.681 | 0.050  | 0.042  | 94             | 102  | 99   | -93  | -94  | 1.80E-6 | 3.28E-6 | 5.96E-6   |  |
| A498                       | 1.461     | 1.128 | 2.090               | 2.086 | 2.074 | 0.397  | 0.153  | 94             | 96   | 92   | -73  | -90  | 1.80E-6 | 3.61E-6 | 7.27E-6   |  |
| ACHN                       | 0.385     | 1.586 | 1.563               | 1.642 | 1.554 | -0.008 | -0.031 | 98             | 105  | 97   | -100 | -100 | 1.74E-6 | 3.11E-6 | 5.58E-6   |  |
| RFX 393                    | 0.888     | 1.518 | 1.544               | 1.561 | 1.456 | 0.145  | 0.049  | 104            | 107  | 90   | -84  | -94  | 1.70E-6 | 3.30E-6 | 6.40E-6   |  |
| SN12C                      | 0.554     | 2.316 | 2.273               | 2.336 | 2.221 | 0.084  | 0.051  | 98             | 101  | 95   | -85  | -91  | 1.77E-6 | 3.37E-6 | 6.40E-6   |  |
| TK-10                      | 0.939     | 1.899 | 1.825               | 1.856 | 2.103 | 0.032  | 0.010  | 92             | 96   | 121  | -97  | -99  | 2.12E-6 | 3.60E-6 | 6.11E-6   |  |
| UO-31                      | 0.610     | 1.813 | 1.653               | 1.625 | 1.593 | 0.038  | 0.020  | 87             | 84   | 82   | -94  | -97  | 1.52E-6 | 2.62E-6 | 5.63E-6   |  |
| Prostate Cancer            |           |       |                     |       |       |        |        |                |      |      |      |      |         |         |           |  |
| PC-3                       | 0.671     | 2.722 | 2.638               | 2.637 | 2.598 | 0.136  | 0.111  | 96             | 96   | 94   | -80  | -84  | 1.79E-6 | 3.47E-6 | 6.74E-6   |  |
| DU-145                     | 0.393     | 1.779 | 1.811               | 1.812 | 1.705 | 0.040  | -0.001 | 102            | 102  | 95   | -90  | -100 | 1.74E-6 | 3.26E-6 | 6.08E-6   |  |
| Breast Cancer              |           |       |                     |       |       |        |        |                |      |      |      |      |         |         |           |  |
| MCF7                       | 0.440     | 2.461 | 2.172               | 2.210 | 1.794 | 0.088  | 0.063  | 86             | 88   | 67   | -80  | -86  | 1.31E-6 | 2.86E-6 | 6.25E-6   |  |
| MDA-MB-231/ATCC            | 0.663     | 2.145 | 2.152               | 2.137 | 2.021 | 0.094  | 0.096  | 100            | 99   | 92   | -86  | -96  | 1.72E-6 | 3.28E-6 | 6.28E-6   |  |
| HS 578T                    | 1.019     | 1.956 | 2.017               | 1.977 | 1.868 | 0.519  | 0.420  | 107            | 102  | 91   | -49  | -59  | 1.95E-6 | 4.45E-6 | 1.25E-5   |  |
| BT-549                     | 1.227     | 2.206 | 2.022               | 2.186 | 2.171 | 0.343  | 0.196  | 81             | 98   | 96   | -72  | -84  | 1.88E-6 | 3.73E-6 | 7.39E-6   |  |
| T-47D                      | 0.976     | 2.089 | 1.949               | 2.018 | 1.842 | 0.373  | 0.304  | 87             | 94   | 78   | -62  | -69  | 1.58E-6 | 3.61E-6 | 8.23E-6   |  |
| MDA-MB-468                 | 0.982     | 1.980 | 1.904               | 2.043 | 2.101 | 0.266  | 0.174  | 92             | 106  | 112  | -73  | -82  | 2.17E-6 | 4.03E-6 | 7.51E-6   |  |

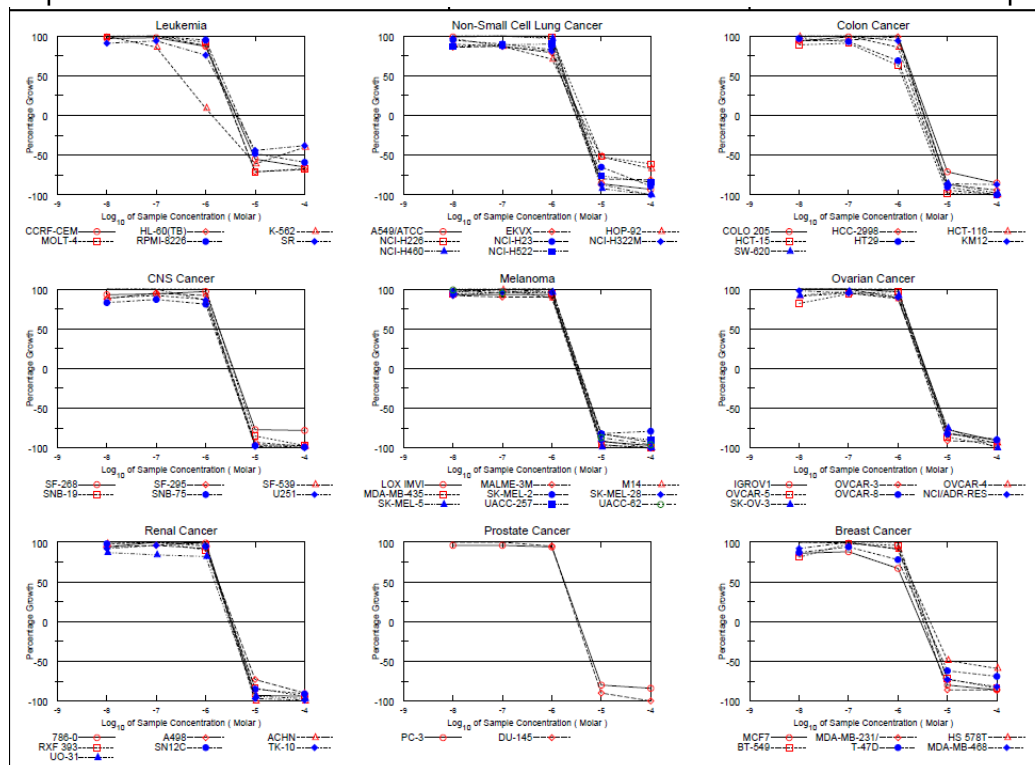



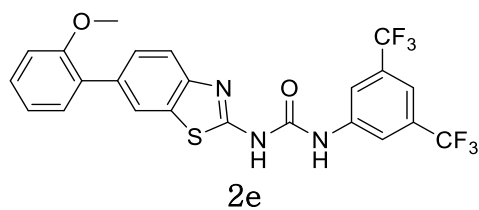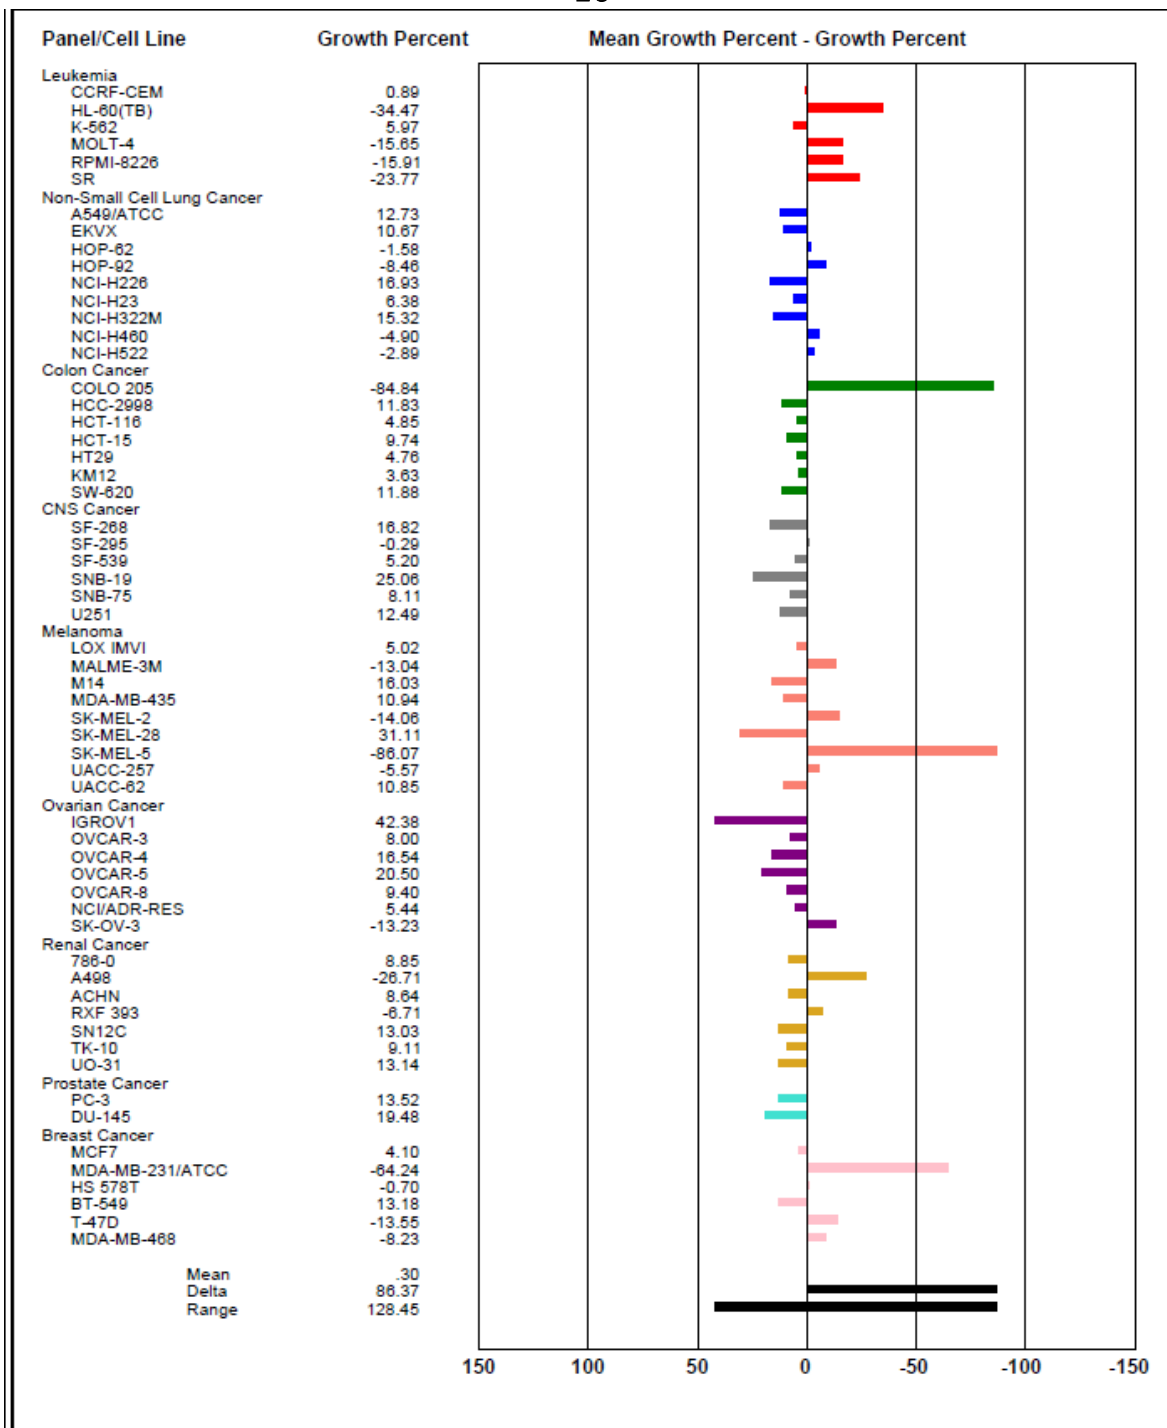

| Panel/Cell Line            | Time Zero | Log10 Concentration |       |       |       |       |        |      |      |      |      | Percent Growth |         |         |           | GI50 | TGI | LC50 |
|----------------------------|-----------|---------------------|-------|-------|-------|-------|--------|------|------|------|------|----------------|---------|---------|-----------|------|-----|------|
|                            |           | Ctrl                | -8.0  | -7.0  | -6.0  | -5.0  | -4.0   | -8.0 | -7.0 | -6.0 | -5.0 | -4.0           |         |         |           |      |     |      |
| Leukemia                   |           |                     |       |       |       |       |        |      |      |      |      |                |         |         |           |      |     |      |
| CCRF-CEM                   | 0.434     | 1.384               | 1.500 | 1.548 | 1.154 | 0.518 | 0.255  | 112  | 117  | 76   | 9    | -41            | 2.43E-6 | 1.50E-5 | > 1.00E-4 |      |     |      |
| HL-60(TB)                  | 0.750     | 1.887               | 1.687 | 1.749 | 1.790 | 0.384 | 0.12   | 94   | 89   | 93   | -49  | -85            | 2.01E-6 | 4.93E-6 | 1.08E-5   |      |     |      |
| K-562                      | 0.269     | 1.586               | 1.495 | 1.380 | 1.089 | 0.261 | 0.065  | 93   | 84   | 82   | -3   | -76            | 1.54E-6 | 8.95E-6 | 4.36E-5   |      |     |      |
| MOLT-4                     | 0.735     | 2.182               | 1.850 | 1.837 | 1.678 | 0.657 | 0.250  | 77   | 76   | 65   | -11  | -66            | 1.59E-6 | 7.24E-6 | 5.13E-5   |      |     |      |
| RPMI-8226                  | 0.587     | 2.118               | 2.189 | 2.289 | 1.647 | 0.459 | 0.220  | 105  | 111  | 69   | -22  | -63            | 1.63E-6 | 5.76E-6 | 4.93E-5   |      |     |      |
| SR                         | 0.441     | 1.333               | 1.266 | 1.158 | 1.118 | 0.311 | 0.071  | 92   | 80   | 76   | -29  | -84            | 1.70E-6 | 5.25E-6 | 2.38E-5   |      |     |      |
| Non-Small Cell Lung Cancer |           |                     |       |       |       |       |        |      |      |      |      |                |         |         |           |      |     |      |
| A549/ATCC                  | 0.361     | 1.574               | 1.583 | 1.554 | 1.506 | 0.437 | 0.070  | 101  | 98   | 94   | 6    | -81            | 3.19E-6 | 1.18E-5 | 4.43E-5   |      |     |      |
| HOP-92                     | 0.745     | 2.019               | 1.997 | 1.924 | 1.931 | 0.445 | 0.020  | 90   | 93   | 93   | -40  | -97            | 2.10E-6 | 4.99E-6 | 1.48E-5   |      |     |      |
| HOP-92                     | 1.114     | 1.811               | 1.506 | 1.512 | 1.396 | 0.750 | 0.123  | 79   | 80   | 57   | -33  | -59            | 1.19E-6 | 4.31E-6 | 2.03E-5   |      |     |      |
| NCI-H226                   | 0.841     | 1.812               | 1.788 | 1.838 | 1.714 | 0.594 | 0.127  | 98   | 103  | 90   | -29  | -85            | 2.16E-6 | 5.67E-6 | 2.35E-5   |      |     |      |
| NCI-H23                    | 0.511     | 1.811               | 1.795 | 1.743 | 1.524 | 0.441 | 0.013  | 99   | 95   | 78   | -14  | -98            | 2.02E-6 | 7.09E-6 | 2.71E-5   |      |     |      |
| NCI-H322M                  | 0.874     | 2.013               | 1.895 | 1.888 | 1.937 | 0.838 | 0.133  | 90   | 89   | 93   | -4   | -85            | 2.78E-6 | 9.06E-6 | 3.70E-5   |      |     |      |
| NCI-H460                   | 0.221     | 2.147               | 2.227 | 2.333 | 1.971 | 0.167 | 0.016  | 104  | 110  | 91   | -25  | -83            | 2.26E-6 | 6.12E-6 | 2.35E-5   |      |     |      |
| NCI-H522                   | 0.892     | 2.064               | 1.958 | 1.841 | 1.676 | 0.874 | 0.068  | 82   | 81   | 67   | -2   | -92            | 1.76E-6 | 9.35E-6 | 3.39E-5   |      |     |      |
| Colon Cancer               |           |                     |       |       |       |       |        |      |      |      |      |                |         |         |           |      |     |      |
| COLO 205                   | 0.508     | 1.825               | 1.786 | 1.825 | 1.551 | 0.232 | 0.034  | 97   | 100  | 79   | -54  | -93            | 1.65E-6 | 3.92E-6 | 9.28E-5   |      |     |      |
| HCC-2998                   | 0.894     | 2.320               | 2.287 | 2.188 | 2.051 | 0.787 | 0.047  | 96   | 92   | 83   | -4   | -93            | 2.65E-6 | 1.11E-5 | 3.61E-5   |      |     |      |
| HCT-116                    | 0.165     | 1.417               | 1.188 | 1.313 | 0.854 | 0.030 | 0.008  | 81   | 92   | 54   | -85  | -98            | 1.07E-6 | 2.45E-6 | 5.61E-5   |      |     |      |
| HCT-15                     | 0.192     | 1.373               | 1.263 | 1.309 | 1.166 | 0.223 | 0.010  | 91   | 95   | 82   | 3    | -95            | 2.55E-6 | 1.06E-5 | 3.46E-5   |      |     |      |
| HT29                       | 0.230     | 1.350               | 1.332 | 1.275 | 1.084 | 0.224 | 0.014  | 98   | 93   | 76   | -3   | -94            | 2.15E-6 | 9.21E-6 | 3.30E-5   |      |     |      |
| KM12                       | 0.508     | 2.595               | 2.579 | 2.549 | 2.217 | 0.410 | 0.032  | 99   | 98   | 82   | -19  | -94            | 2.07E-6 | 6.45E-6 | 2.59E-5   |      |     |      |
| SW-620                     | 0.265     | 1.762               | 1.779 | 1.817 | 1.657 | 0.327 | 0.053  | 101  | 104  | 93   | 4    | -80            | 3.04E-6 | 1.12E-5 | 4.40E-5   |      |     |      |
| CNS Cancer                 |           |                     |       |       |       |       |        |      |      |      |      |                |         |         |           |      |     |      |
| SF-268                     | 0.537     | 1.918               | 1.909 | 1.854 | 1.704 | 0.660 | 0.040  | 99   | 95   | 85   | 9    | -93            | 2.86E-6 | 1.22E-5 | 3.81E-5   |      |     |      |
| SF-295                     | 0.894     | 2.296               | 2.074 | 2.166 | 2.100 | 0.588 | 0.019  | 87   | 92   | 88   | -3   | -97            | 2.94E-6 | 9.33E-6 | 3.18E-5   |      |     |      |
| SF-539                     | 0.102     | 2.615               | 2.324 | 2.446 | 2.357 | 0.714 | 0.010  | 82   | 89   | 84   | -29  | -99            | 1.99E-6 | 5.50E-6 | 1.97E-5   |      |     |      |
| SNB-19                     | 0.445     | 1.798               | 1.795 | 1.818 | 1.470 | 0.570 | 0.013  | 100  | 101  | 76   | 9    | -97            | 2.44E-6 | 1.22E-5 | 3.61E-5   |      |     |      |
| SNB-75                     | 0.886     | 1.716               | 1.563 | 1.647 | 1.499 | 0.938 | 0.182  | 82   | 92   | 74   | 6    | -79            | 2.25E-6 | 1.18E-5 | 4.53E-5   |      |     |      |
| U251                       | 0.334     | 1.474               | 1.533 | 1.576 | 1.223 | 0.348 | 0.020  | 105  | 109  | 78   | 1    | -94            | 2.31E-6 | 1.03E-5 | 3.44E-5   |      |     |      |
| Melanoma                   |           |                     |       |       |       |       |        |      |      |      |      |                |         |         |           |      |     |      |
| LOX IMVI                   | 0.333     | 2.312               | 2.255 | 2.242 | 2.147 | 0.023 | 0.009  | 97   | 96   | 92   | -93  | -97            | 1.68E-6 | 3.13E-6 | 5.84E-5   |      |     |      |
| MALME-3M                   | 0.572     | 1.196               | 1.156 | 1.171 | 1.097 | 0.292 | 0.009  | 94   | 96   | 84   | -49  | -88            | 1.81E-6 | 4.29E-6 | 1.05E-5   |      |     |      |
| M14                        | 0.420     | 1.512               | 1.338 | 1.408 | 1.289 | 0.097 | 0.006  | 84   | 90   | 80   | -77  | -99            | 1.54E-6 | 3.22E-6 | 6.73E-6   |      |     |      |
| MDA-MB-435                 | 0.592     | 2.405               | 2.282 | 2.381 | 2.184 | 0.484 | 0.001  | 93   | 99   | 88   | -18  | -100           | 2.27E-6 | 6.73E-6 | 2.45E-5   |      |     |      |
| SK-MEL-2                   | 1.031     | 2.081               | 2.030 | 2.023 | 1.917 | 0.792 | 0.024  | 95   | 95   | 84   | -23  | -98            | 2.09E-6 | 6.09E-6 | 2.29E-5   |      |     |      |
| SK-MEL-28                  | 0.753     | 2.248               | 2.091 | 2.201 | 2.036 | 0.726 | 0.005  | 90   | 97   | 86   | -4   | -99            | 2.51E-6 | 9.10E-6 | 3.05E-5   |      |     |      |
| SK-MEL-5                   | 0.632     | 2.939               | 2.848 | 2.917 | 2.801 | 0.333 | 0.009  | 96   | 99   | 85   | -95  | -99            | 1.57E-6 | 2.98E-6 | 5.64E-5   |      |     |      |
| UACC-257                   | 1.062     | 1.992               | 1.973 | 2.015 | 1.901 | 0.844 | 0.034  | 98   | 102  | 90   | -21  | -97            | 2.31E-6 | 6.52E-6 | 2.43E-5   |      |     |      |
| UACC-82                    | 0.631     | 2.445               | 2.333 | 2.455 | 2.091 | 0.149 | -0.005 | 94   | 101  | 80   | -76  | -100           | 1.59E-6 | 3.26E-6 | 6.78E-5   |      |     |      |
| Ovarian Cancer             |           |                     |       |       |       |       |        |      |      |      |      |                |         |         |           |      |     |      |
| IGROV1                     | 0.375     | 1.737               | 1.719 | 1.691 | 1.586 | 0.412 | 0.024  | 99   | 87   | 89   | 3    | -94            | 2.83E-6 | 1.07E-5 | 3.52E-5   |      |     |      |
| OVCAR-3                    | 0.417     | 1.450               | 1.478 | 1.471 | 1.155 | 0.264 | 0.015  | 103  | 102  | 71   | -37  | -97            | 1.58E-6 | 4.58E-6 | 1.67E-5   |      |     |      |
| OVCAR-4                    | 0.826     | 1.694               | 1.576 | 1.613 | 1.448 | 0.825 | 0.034  | 90   | 94   | 74   | 0    | -98            | 2.12E-6 | 9.98E-6 | 3.32E-5   |      |     |      |
| OVCAR-5                    | 0.581     | 1.340               | 1.245 | 1.242 | 1.226 | 0.574 | 0.023  | 87   | 87   | 85   | -1   | -96            | 2.54E-6 | 9.66E-6 | 3.27E-5   |      |     |      |
| OVCAR-8                    | 0.581     | 2.200               | 2.228 | 2.213 | 2.092 | 0.642 | 0.176  | 102  | 101  | 93   | 4    | -70            | 3.04E-6 | 1.12E-5 | 5.38E-5   |      |     |      |
| NCIADR-RES                 | 0.487     | 1.877               | 1.683 | 1.636 | 1.546 | 0.415 | 0.093  | 100  | 96   | 89   | -15  | -81            | 2.37E-6 | 7.19E-6 | 3.40E-5   |      |     |      |
| SK-OV-3                    | 0.894     | 1.895               | 1.764 | 1.849 | 1.754 | 0.949 | 0.087  | 90   | 98   | 88   | 6    | -93            | 2.92E-6 | 1.14E-5 | 3.69E-5   |      |     |      |
| Renal Cancer               |           |                     |       |       |       |       |        |      |      |      |      |                |         |         |           |      |     |      |
| 786-O                      | 0.403     | 1.704               | 1.537 | 1.602 | 1.343 | 0.126 | 0.005  | 87   | 92   | 72   | -69  | -99            | 1.44E-6 | 3.25E-6 | 7.36E-5   |      |     |      |
| A498                       | 1.422     | 2.138               | 2.082 | 2.081 | 1.987 | 0.645 | 0.014  | 92   | 92   | 79   | -55  | -99            | 1.84E-6 | 3.90E-6 | 9.23E-5   |      |     |      |
| ACHN                       | 0.379     | 1.616               | 1.521 | 1.612 | 1.364 | 0.341 | 0.006  | 92   | 100  | 80   | -10  | -99            | 2.14E-6 | 7.71E-6 | 2.82E-5   |      |     |      |
| CAKI-1                     | 0.767     | 2.725               | 2.463 | 2.561 | 2.574 | 0.594 | 0.031  | 87   | 92   | 92   | -23  | -96            | 2.33E-6 | 6.35E-6 | 2.36E-5   |      |     |      |
| RFX 393                    | 0.685     | 1.324               | 1.379 | 1.393 | 1.248 | 0.526 | 0.022  | 109  | 111  | 88   | -23  | -97            | 2.19E-6 | 6.18E-6 | 2.31E-5   |      |     |      |
| SN12C                      | 0.391     | 1.688               | 1.665 | 1.704 | 1.544 | 0.079 | 0.002  | 101  | 101  | 89   | -30  | -99            | 1.70E-6 | 3.36E-6 | 6.65E-5   |      |     |      |
| TK-10                      | 0.865     | 1.891               | 1.602 | 1.595 | 1.762 | 0.952 | 0.117  | 89   | 88   | 109  | 12   | -87            | 4.03E-6 | 1.32E-5 | 4.25E-5   |      |     |      |
| UO-31                      | 0.608     | 2.046               | 1.960 | 1.956 | 1.833 | 0.277 | 0.035  | 94   | 94   | 85   | -54  | -94            | 1.79E-6 | 4.07E-6 | 9.29E-5   |      |     |      |
| Prostate Cancer            |           |                     |       |       |       |       |        |      |      |      |      |                |         |         |           |      |     |      |
| PC-3                       | 0.440     | 1.387               | 1.323 | 1.361 | 1.023 | 0.388 | 0.023  | 95   | 99   | 63   | -12  | -85            | 1.49E-6 | 6.93E-6 | 2.88E-5   |      |     |      |
| DU-145                     | 0.338     | 1.482               | 1.536 | 1.542 | 1.444 | 0.558 | 0.030  | 105  | 105  | 97   | 19   | -91            | 4.00E-6 | 1.49E-5 | 4.24E-5   |      |     |      |
| Breast Cancer              |           |                     |       |       |       |       |        |      |      |      |      |                |         |         |           |      |     |      |
| MCF7                       | 0.346     | 2.183               | 1.937 | 1.934 | 1.746 | 0.401 | 0.081  | 87   | 86   | 76   | 3    | -77            | 2.28E-6 | 1.09E-5 | 4.62E-5   |      |     |      |
| MDA-MB-231/ATCC            | 0.547     | 1.431               | 1.428 | 1.460 | 1.367 | 0.246 | 0.019  | 100  | 103  | 93   | -55  | -97            | 1.95E-6 | 4.24E-6 | 9.23E-5   |      |     |      |
| HS 578T                    | 0.815     | 1.585               | 1.617 | 1.619 | 1.478 | 0.724 | 0.370  | 104  | 104  | 86   | -11  | -55            | 2.35E-6 | 7.07E-6 | 7.83E-5   |      |     |      |
| BT-549                     | 1.139     | 1.947               | 1.789 | 1.840 | 1.777 | 0.463 | 0.007  | 80   | 87   | 79   | -59  | -99            | 1.62E-6 | 3.72E-6 | 8.56E-5   |      |     |      |
| T-47D                      | 0.703     | 1.578               | 1.451 | 1.490 | 1.361 | 0.701 | 0.398  | 65   | 90   | 75   | 0    | -44            | 2.16E-6 | 9.89E-6 | 1.00E-4   |      |     |      |
| MDA-MB-468                 | 0.640     | 1.326               | 1.337 | 1.353 | 1.095 | 0.467 | 0.095  | 102  | 104  | 96   | -24  | -85            | 1.52E-6 | 5.43E-6 | 2.67E-5   |      |     |      |

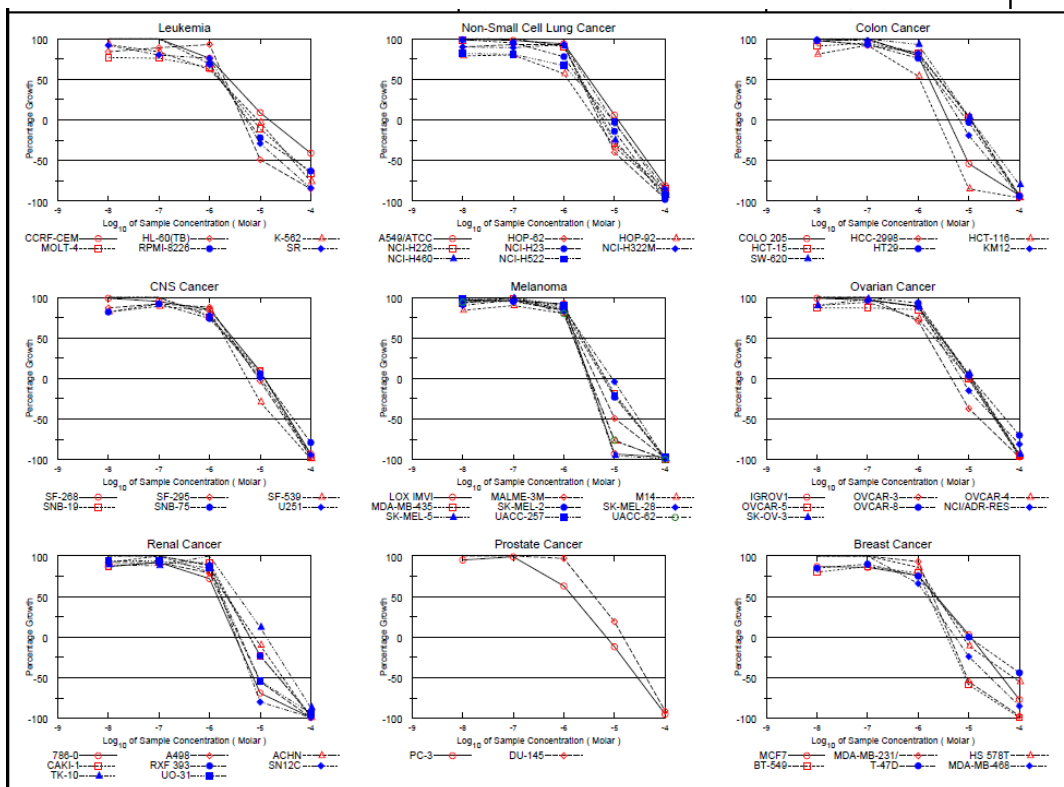

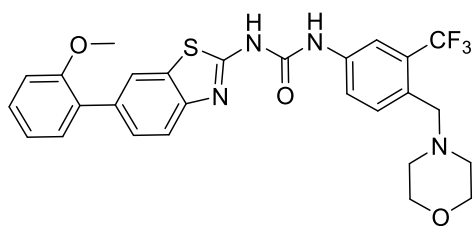

2f

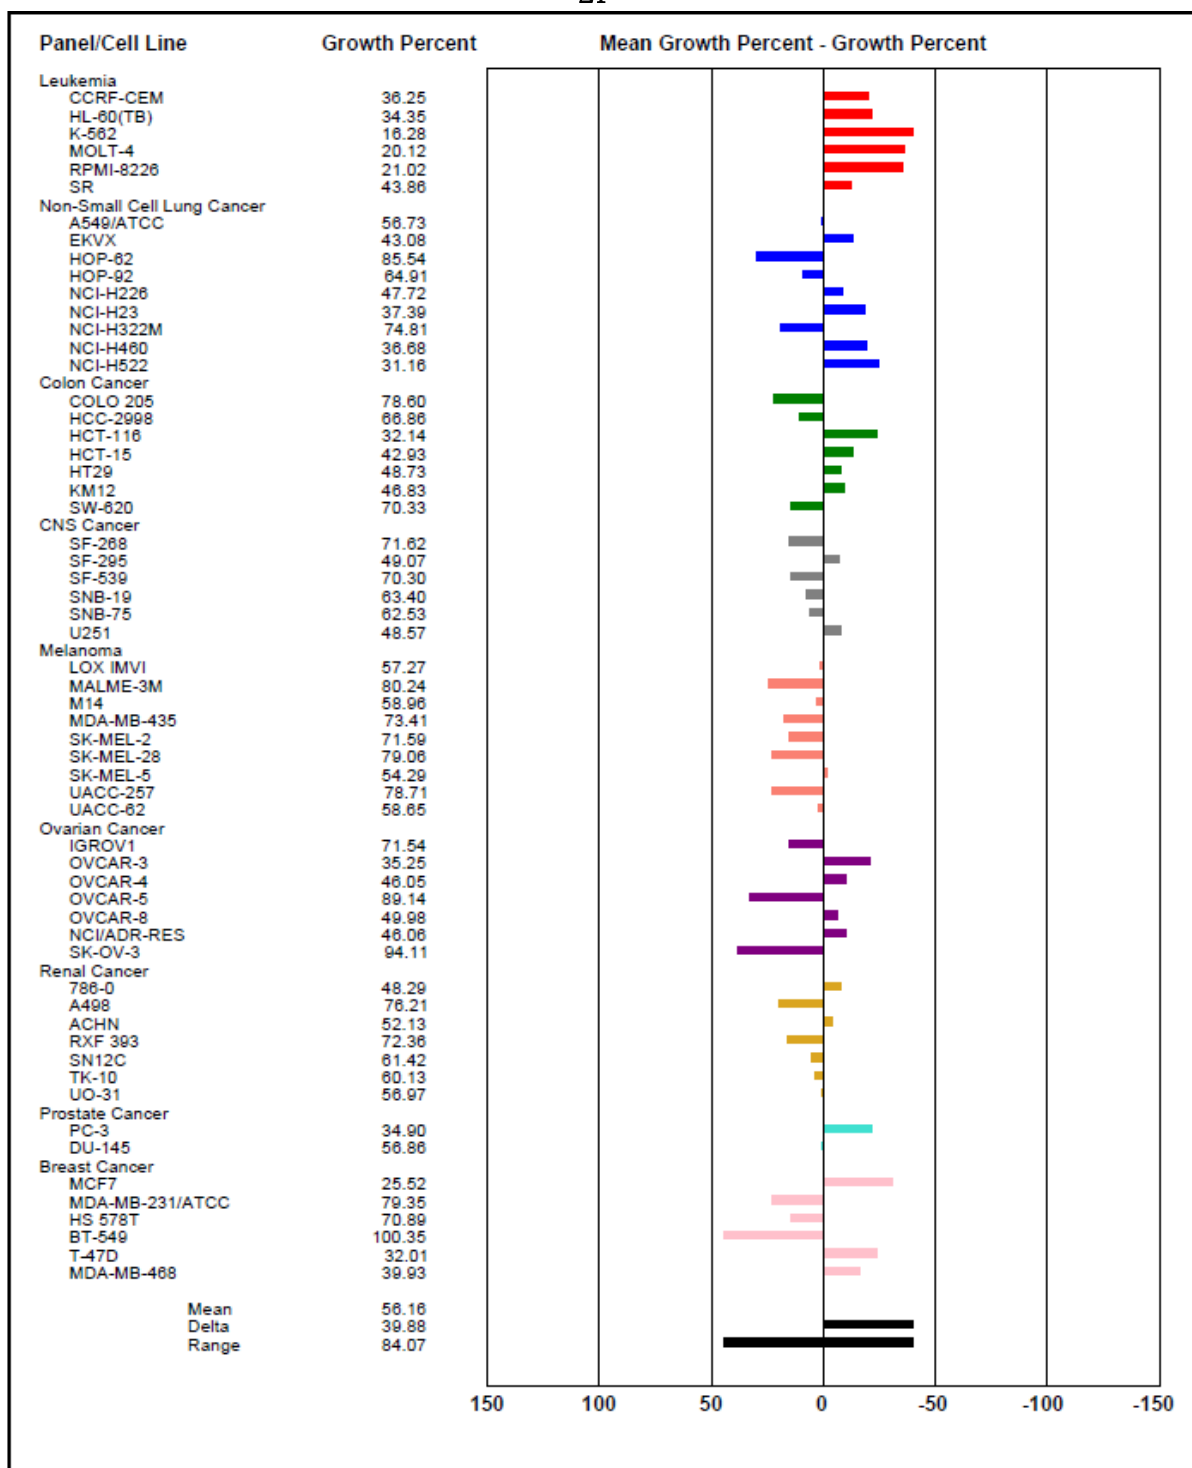

## References

1. Chen L, Fu W, Feng C, Qu R, Tong L, Zheng L, et al. Structure-based design and synthesis of 2, 4-diaminopyrimidines as EGFR L858R/T790M selective inhibitors for NSCLC. *Eur J Med Chem* 2017;140:510–527.
2. Guagnano V, Furet P, Spanka C, Bordas V, Le Douget M, Stamm C, et al. Discovery of 3-(2, 6-dichloro-3, 5-dimethoxy-phenyl)-1-{6-[4-(4-ethyl-piperazin-1-yl)-phenylamino]-pyrimidin-4-yl}-1-methyl-urea (NVP-BGJ398), a potent and selective inhibitor of the fibroblast growth factor receptor family of receptor tyrosine kinase. *J Med Chem* 2011;54(20):7066–7083.
3. Bhattarai D, Jung JH, Han S, Lee H, Oh SJ, Ko HW, et al. Design, synthesis, and biological evaluation of structurally modified isoindolinone and quinazolinone derivatives as hedgehog pathway inhibitors. *Eur J Med Chem* 2017;125:1036–1050.
4. El-Damasy AK, Cho NC, Nam G, Pae AN, Keum G. Discovery of a Nanomolar Multikinase Inhibitor (KST016366): A new benzothiazole derivative with remarkable broad-spectrum antiproliferative activity. *ChemMedChem*. 2016;11(15):1587–1595.
5. Reaction Biology Corporation. Available from: [http://www.reactionbiology.com/webapps/site/Kinase\\_Assay\\_Protocol.aspx](http://www.reactionbiology.com/webapps/site/Kinase_Assay_Protocol.aspx) [last accessed 6 December 2022].
6. El-Damasy AK, Lee JH, Seo SH, Cho NC, Pae AN, Keum G. Design and synthesis of new potent anticancer benzothiazole amides and ureas featuring pyridylamide moiety and possessing dual B-Raf(V600E) and C-Raf kinase inhibitory activities. *Eur J Med Chem* 2016;115:201–216.
7. DTP Human Tumor Cell Line Screen Process: Available from: [https://dtp.cancer.gov/discovery\\_development/nci-60/methodology.htm](https://dtp.cancer.gov/discovery_development/nci-60/methodology.htm) [last accessed 6 December 2022].
8. Tokarski JS, Newitt JA, Chang CYJ, Cheng JD, Wittekind M, Kiefer SE, et al. The structure of dasatinib (BMS-354825) bound to activated ABL kinase domain elucidates its inhibitory activity against imatinib-resistant ABL mutants. *Cancer Res* 2006;66(11):5790–5797.
9. Zhou TJ, Parillon L, Li F, Wang YH, Keats J, Lamore S, et al. Crystal structure of the T315I mutant of abl kinase. *Chem Biol Drug Des* 2007;70(3):171–181.
